# Supplementary material for: The utility of mtDNA and rDNA for barcoding and phylogeny of plant-parasitic nematodes from Longidoridae (Nematoda, Enoplea)
Source: PubMed Central journal article supplement (PMC5589882; doi:10.1038/s41598-017-11085-4), 2017-09-07
Supplement: 41598_2017_11085_MOESM1_ESM.pdf [file 41598_2017_11085_MOESM1_ESM.pdf]

## **Supporting information**

### **The utility of mtDNA and rDNA for barcoding and phylogeny of plant-parasitic nematodes from Longidoridae (Nematoda, Enoplea)**

**Palomares-Rius, J.E.<sup>1</sup>, Cantalapiedra-Navarrete, C.<sup>1</sup>, Archidona-Yuste, A.<sup>1</sup>, Subbotin, S.A.<sup>2,3</sup> and Castillo, P.<sup>1</sup>**

<sup>1</sup>Instituto de Agricultura Sostenible (IAS), Agencia Estatal Consejo Superior de Investigaciones Científicas (CSIC), Avda. Menéndez Pidal s/n, 14004, Córdoba, Spain.

<sup>2</sup>Plant Pest Diagnostic Center, California Department of Food and Agriculture, 3294 Meadowview Road, Sacramento, CA 95832-1448, USA

<sup>3</sup>Center of Parasitology of A.N. Severtsov Institute of Ecology and Evolution of the Russian Academy of Sciences, Leninskii Prospect 33, Moscow, 117071, Russia

**Table S1.** Taxa studied for dagger and needle nematodes species of the family Longidoridae and sequences of cytochrome *c* oxidase subunit 1 (*coxI*) used in this study. For new sequences, species identifications were based on morphology and barcoding using D2-D3 expansion segments of 28S rDNA<sup>1</sup>.

| Nematode species                    | Sample code | Locality                                    | Host plant            | GenBank accession numbers |             |
|-------------------------------------|-------------|---------------------------------------------|-----------------------|---------------------------|-------------|
|                                     |             |                                             |                       | 28S                       | <i>coxI</i> |
| Genus <i>Xiphinema</i> spp.         |             |                                             |                       |                           |             |
| 1. <i>Xiphinema adeno-hystherum</i> | SORIA       | Arévalo de la Sierra, Soria province, Spain | european holly        | KC567164                  | KY816588    |
| <i>Xiphinema adeno-hystherum</i>    | ALMAG       | Almagro, Ciudad Real province, Spain        | wild olive            | * <sup>2</sup>            | KY816589    |
| <i>Xiphinema adeno-hystherum</i>    | AR086       | Prado del Rey, Cádiz province, Spain        | wild olive            | *                         | KY816590    |
| <i>Xiphinema adeno-hystherum</i>    | AR078       | Almodóvar, Córdoba province, Spain          | wild olive            | *                         | KY816591    |
| <i>Xiphinema adeno-hystherum</i>    | IASNB       | Jerez de la Frontera, Cádiz province, Spain | wild olive            | *                         | KY816592    |
| 2. <i>Xiphinema americanum</i>      | -           | USA                                         | orchard fruit         | -                         | AM086693    |
| <i>Xiphinema americanum</i>         | CD48        | California, USA                             | plum                  | KX263169                  | KX263063    |
| <i>Xiphinema americanum</i>         | CD82b       | California, USA                             | grape                 | KX263145                  | KX263064    |
| <i>Xiphinema americanum</i>         | CD100       | California, USA                             | grape                 | KX263151                  | KX263062    |
| <i>Xiphinema americanum</i>         | CD1074      | Georgia, USA                                | -                     | KX263168                  | KX263050    |
| <i>Xiphinema americanum</i>         | CD1078      | Texas, USA                                  | -                     | KX263173                  | KX263054    |
| <i>Xiphinema americanum</i>         | CD1244      | California, USA                             | orange                | KX263171                  | KX263053    |
| <i>Xiphinema americanum</i>         | XA34        | California, USA                             | walnut                | KX263172                  | KX263059    |
| <i>Xiphinema americanum</i>         | XA70        | California, USA                             | cherry                | KX263146                  | KX263047    |
| <i>Xiphinema americanum</i>         | CD1816a     | Stavropol Krai, Kislovodsk, Russia          | cherry                | KX263179                  | KX263106    |
| <i>Xiphinema americanum</i>         | CD1816b     | Stavropol Krai, Kislovodsk, Russia          | cherry                | KX263179                  | KX263107    |
| 3. <i>Xiphinema andalusiense</i>    | ARO93       | Belmez ,Córdoba, Spain                      | wild olive            | KX244884                  | KY816593    |
| <i>Xiphinema andalusiense</i>       | 00419       | Andújar, Jaén, Spain                        | wild olive            | KX244885                  | KY816594    |
| <i>Xiphinema andalusiense</i>       | AR108       | Villaviciosa ,Córdoba, Spain                | wild olive            | KX244888                  | KY816595    |
| 4. <i>Xiphinema astaregiense</i>    | J0174       | Jerez de la Frontera, Cádiz province, Spain | sunflower             | KP268955                  | KP268977    |
| 5. <i>Xiphinema baetica</i>         | LOMAS       | Hinojos, Huelva province, Spain             | stone pine            | KC567165                  | KY816596    |
| <i>Xiphinema baetica</i>            | HATRA       | Villamanrique de la Condesa, Huelva, Spain  | cork oak              | KC567166                  | KY816597    |
| 6. <i>Xiphinema bakeri</i>          | CD852       | California, USA                             | -                     | KF292277                  | KF292305    |
| <i>Xiphinema bakeri</i>             | CD840       | California, USA                             | <i>Salix</i> sp.      | KF292278                  | KF292306    |
| 7. <i>Xiphinema belmontense</i>     | MOUCH       | Merza, Pontevedra province, Spain           | chestnut              | KC567171                  | KY816598    |
| 8. <i>Xiphinema brevicolle</i>      | -           | Brazil                                      | <i>Coffea arabica</i> | - <sup>3</sup>            | AM086707    |
| <i>Xiphinema brevicolle</i>         | -           | Breclav, Czech Republic                     | grapevine             | HM163209                  | HM163206    |
| <i>Xiphinema brevicolle</i>         | CD1816      | Stavropol Krai, Kislovodsk, Russia          | cherry                | KX263179                  | KX263106    |
| <i>Xiphinema brevicolle</i>         | CD1816      | Stavropol Krai, Kislovodsk, Russia          | cherry                | KX263179                  | KX263107    |
| <i>Xiphinema brevicolle</i>         | -           | Chiba, Yachimata, Japan                     | <i>Ilex crenata</i>   | -                         | AB675670    |
| <i>Xiphinema brevicolle</i>         | -           | Chiba, Yachimata, Japan                     | <i>Ilex crenata</i>   | -                         | AB675672    |
| <i>Xiphinema brevicolle</i>         | -           | Chiba, Yachimata, Japan                     | <i>Ilex crenata</i>   | -                         | AB675673    |

| Nematode species                           | Sample code | Locality                                    | Host plant                | GenBank accession numbers |          |
|--------------------------------------------|-------------|---------------------------------------------|---------------------------|---------------------------|----------|
| <i>Xiphinema brevicolle</i>                | -           | Chiba, Sosa, Japan                          | <i>Ilex crenata</i>       | -                         | AB604337 |
| <i>Xiphinema brevicolle</i>                | -           | Chiba, Togane, Japan                        | <i>Ilex crenata</i>       | -                         | AB655671 |
| <i>Xiphinema brevicolle</i>                | -           | Chiba, Yachimata, Japan                     | <i>Ilex crenata</i>       | -                         | AB675669 |
| 9. <i>Xiphinema brevisicum</i>             | CARIX       | Merza, Pontevedra province, Spain           | oak                       | KP268962                  | KP268979 |
| 10. <i>Xiphinema browni</i>                | -           | Moca, Slovakia                              | grapevine                 | -                         | KU250158 |
| <i>Xiphinema browni</i>                    | -           | Slovakia                                    | grapevine                 | -                         | AM086708 |
| <i>Xiphinema browni</i>                    | NSB1        | Kurdejov, Czech Republic                    | grapevine                 | KU250151                  | GU222424 |
| 11. <i>Xiphinema cadavalense</i>           | ST077       | Espiel, Córdoba province, Spain             | cultivated olive          | KX244932                  | KY816599 |
| 12. <i>Xiphinema californicum</i>          | CD3         | California, USA                             | cherry                    | KX263143                  | KX263071 |
| <i>Xiphinema californicum</i>              | CD231       | California, USA                             | lemon                     | KX263166                  | KX263067 |
| <i>Xiphinema californicum</i>              | CD1247      | California, USA                             | orange                    | KX263156                  | KX263073 |
| <i>Xiphinema californicum</i>              | CD1818      | California, USA                             | <i>Acer</i> sp.           | KX263153                  | KX263069 |
| <i>Xiphinema californicum</i>              | XA4         | California, USA                             | peach                     | KX263165                  | KX263077 |
| <i>Xiphinema californicum</i>              | XA5         | California, USA                             | plum                      | KX263162                  | KX263078 |
| <i>Xiphinema californicum</i>              | XA8         | California, USA                             | plum                      | KX263164                  | KX263079 |
| <i>Xiphinema californicum</i>              | XA42        | California, USA                             | walnut                    | KX263159                  | KX263081 |
| <i>Xiphinema californicum</i>              | XA44        | California, USA                             | cherry                    | -                         | KX263080 |
| 13. <i>Xiphinema celtiense</i>             | AR083       | Adamuz, Córdoba province, Spain             | wild olive                | KX244889                  | KY816600 |
| <i>Xiphinema celtiense</i>                 | AR082       | Adamuz, Córdoba province, Spain             | wild olive                | KX244890                  | KY816601 |
| 14. <i>Xiphinema</i> cf. <i>americanum</i> | -           | Florida, USA                                | -                         | -                         | AM086689 |
| <i>Xiphinema</i> cf. <i>americanum</i>     | -           | South Africa                                | -                         | -                         | AM086690 |
| <i>Xiphinema</i> cf. <i>americanum</i>     | -           | Florida, USA                                | -                         | -                         | AM086691 |
| <i>Xiphinema</i> cf. <i>americanum</i>     | -           | Nepal                                       | -                         | -                         | AM086704 |
| 15. <i>Xiphinema chambersi</i>             | -           | Jekyll Island, Georgia USA                  | <i>Quercus virginiana</i> | -                         | KU764412 |
| <i>Xiphinema chambersi</i>                 | -           | Jekyll Island, Georgia USA                  | <i>Quercus virginiana</i> | -                         | KU764413 |
| <i>Xiphinema chambersi</i>                 | -           | Jekyll Island, Georgia USA                  | <i>Quercus virginiana</i> | -                         | KU764414 |
| <i>Xiphinema chambersi</i>                 | -           | Jekyll Island, Georgia USA                  | <i>Quercus virginiana</i> | -                         | KU764415 |
| <i>Xiphinema chambersi</i>                 | -           | Jekyll Island, Georgia USA                  | <i>Quercus virginiana</i> | -                         | KU764416 |
| <i>Xiphinema chambersi</i>                 | -           | Jekyll Island, Georgia USA                  | <i>Quercus virginiana</i> | -                         | KU764417 |
| <i>Xiphinema chambersi</i>                 | -           | Jekyll Island, Georgia USA                  | <i>Quercus virginiana</i> | -                         | KU764418 |
| <i>Xiphinema chambersi</i>                 | -           | Jekyll Island, Georgia USA                  | <i>Quercus virginiana</i> | -                         | KU764419 |
| 16. <i>Xiphinema coxni</i>                 | J0126       | Puerto de Sta. María, Cádiz province, Spain | grapevine                 | KC567173                  | KY816602 |
| 17. <i>Xiphinema conurum</i>               | ST45V       | Sorbas, Almería province, Spain             | cultivated olive          | KX244892                  | KY816603 |
| 18. <i>Xiphinema costaricense</i>          | ACC86       | Guayabo. Turrialba. Cartago                 | forest                    | KX931056                  | KY816604 |
| <i>Xiphinema costaricense</i>              | ACC46       | Santa Rosa. Limón. Limón                    | cocoa                     | KX931057                  | KY816605 |
| 19. <i>Xiphinema coxi europaeum</i>        | AR020       | Hinojos, Huelva province, Spain             | wild olive                | KC567174                  | KY816606 |
| <i>Xiphinema coxi europaeum</i>            | H0027       | Almonte, Huelva province, Spain             | cork oak                  | KC567177                  | KY816607 |
| 20. <i>Xiphinema cretense</i>              | AR039       | Hersonisos province                         | wild olive                | KJ802878                  | KY816608 |
| 21. <i>Xiphinema dentatum</i>              | -           | Silnicna, Czech Republic                    | Forest soil               | EU781538                  | EU781537 |

| Nematode species                     | Sample code | Locality                                          | Host plant                  | GenBank accession numbers |          |
|--------------------------------------|-------------|---------------------------------------------------|-----------------------------|---------------------------|----------|
| 22. <i>Xiphinema diffusum</i>        | -           | Australia                                         | Grapevine                   | -                         | AM086700 |
| <i>Xiphinema diffusum</i>            | -           | Brazil                                            | Orchard fruit               | -                         | AM086699 |
| <i>Xiphinema diffusum</i>            | -           | China                                             | Unknown                     | -                         | AM086701 |
| <i>Xiphinema diffusum</i>            | -           | Brazil                                            | Unknown                     | -                         | AM086698 |
| 23. <i>Xiphinema diversicaudatum</i> | -           | Bile Podoli, Czech Republic                       | sour cherry                 | -                         | GU222421 |
| <i>Xiphinema diversicaudatum</i>     | CD1311      | Varenikovskaya, Russia                            | <i>Salix alba</i>           | -                         | KF292294 |
| <i>Xiphinema diversicaudatum</i>     | CD1308      | Saratov, Russia                                   | <i>Acer negundo</i> L.      | KF292279                  | KF292298 |
| <i>Xiphinema diversicaudatum</i>     | CD1283      | Moscow region, Serpukhov, Russia                  | <i>Salix alba</i> L.        | KF292280                  | KF292297 |
| <i>Xiphinema diversicaudatum</i>     | CD1335      | Moscow region, Serpukhov, Russia                  | <i>Populus nigra</i> L.     | -                         | KF292296 |
| <i>Xiphinema diversicaudatum</i>     | CD1330      | Moscow region, Klyazma, Russia                    | <i>Ulmus glabra</i> Huds    | -                         | KF292301 |
| <i>Xiphinema diversicaudatum</i>     | CD1331      | Voronezh region, Ramon, Russia                    | <i>S. alba</i>              | -                         | KF292295 |
| <i>Xiphinema diversicaudatum</i>     | CD1309      | Voronezh region, Ramon, Russia                    | <i>Alnus glutinosa</i> L.   | -                         | KF292302 |
| <i>Xiphinema diversicaudatum</i>     | CD1338      | Krasnodar Territory, Sochi, Russia                | <i>Citrus unshiu</i> Marc.  | -                         | KF292287 |
| <i>Xiphinema diversicaudatum</i>     | CD1310      | Krasnodar Territory, Sochi, Russia                | <i>Medicago lupulina</i> L. | -                         | KF292292 |
| <i>Xiphinema diversicaudatum</i>     | CD1332      | Krasnodar Territory, Sochi, Russia                | <i>Urtica dioica</i> L.     | -                         | KF292286 |
| <i>Xiphinema diversicaudatum</i>     | CD1312      | Krasnodar Territory, Sukko, Russia                | <i>Sambucus nigra</i> L.    | -                         | KF292284 |
| <i>Xiphinema diversicaudatum</i>     | CD1313      | Krasnodar Territory, Sukko, Russia                | <i>Corylus avellana</i> L.  | -                         | KF292290 |
| <i>Xiphinema diversicaudatum</i>     | CD1336      | Krasnodar Territory, Sukko, Russia                | <i>P. alba</i>              | -                         | KF292288 |
| <i>Xiphinema diversicaudatum</i>     | CD1348      | Predela, Bulgaria                                 | Meadow plants               | -                         | KF292303 |
| <i>Xiphinema diversicaudatum</i>     | CD1349      | Bachevo, Perivol, Bulgaria                        | <i>Picea abies</i> L.       | -                         | KF292304 |
| 24. <i>Xiphinema duriense</i>        | ST02C       | Gibraleón, Huelva province, Spain                 | cultivated olive            | KP268963                  | KY816609 |
| 25. <i>Xiphinema floridae</i>        | -           | USA                                               | Orchard fruit               | -                         | AM086696 |
| <i>Xiphinema floridae</i>            | -           | USA                                               | Orchard fruit               | -                         | AM086697 |
| 26. <i>Xiphinema georgianum</i>      | -           | USA                                               | Orchard fruit               | -                         | AM086695 |
| 27. <i>Xiphinema gersoni</i>         | H0059       | Almonte, Huelva province, Spain                   | eucalyptus                  | KC567180                  | KY816610 |
| 28. <i>Xiphinema herakliense</i>     | OLEA8       | Vathy Rema, Crete Island , Greece                 | wild olive                  | KM586345                  | KY816611 |
| <i>Xiphinema herakliense</i>         | OLEA17      | Agiofarago, Crete Island , Greece                 | wild olive                  | KM58636                   | KY816612 |
| <i>Xiphinema herakliense</i>         | OLE18       | Agiofarago, Crete Island , Greece                 | wild olive                  | KM58639                   | KY816613 |
| 29. <i>Xiphinema hispanum</i>        | 00419       | Andújar, Jaén province, Spain                     | wild olive                  | GU725074                  | KY816614 |
| 30. <i>Xiphinema hispidum</i>        | AR098       | Bollullos par del Condado, Huelva province, Spain | grapevine                   | KC567181                  | KY816615 |
| <i>Xiphinema hispidum</i>            | H0026       | Rociana del Condado, Huelva province, Spain       | grapevine                   | HM921366                  | KY816616 |
| 31. <i>Xiphinema inaequale</i>       | -           | Bajjnath. India                                   | <i>Terminalia bellirica</i> | -                         | HM163207 |
| 32. <i>Xiphinema incertum</i>        | -           | Jerez de la Frontera, Cádiz province, Spain       | -                           | -                         | JQ990058 |
| 33. <i>Xiphinema incognitum</i>      | -           | China                                             | litchi                      | -                         | AM086705 |
| <i>Xiphinema incognitum</i>          | -           | China                                             | litchi                      | -                         | AM086706 |
| 34. <i>Xiphinema index</i>           | IN393       | Moriles, Córdoba province, Spain                  | grapevine                   | HM921398                  | HM921380 |
| <i>Xiphinema index</i>               | IN116       | Montemayor, Córdoba province, Spain               | grapevine                   | HM921399                  | HM921381 |
| <i>Xiphinema index</i>               | IN116       | Montemayor, Córdoba province, Spain               | grapevine                   | HM921400                  | HM921382 |
| <i>Xiphinema index</i>               | INAUL       | Aulaga, Córdoba province, Spain                   | grapevine                   | HM921401                  | HM921383 |

| Nematode species                     | Sample code | Locality                                           | Host plant                  | GenBank accession numbers |          |
|--------------------------------------|-------------|----------------------------------------------------|-----------------------------|---------------------------|----------|
| <i>Xiphinema index</i>               | IN499       | Jerez de la Fra., Cádiz province, Spain            | grapevine                   | HM921402                  | HM921384 |
| <i>Xiphinema index</i>               | IN474       | Rociana, Huelva province, Spain                    | grapevine                   | HM921403                  | HM921385 |
| <i>Xiphinema index</i>               | INNR4       | Parteolla, Sardinia province, Italy                | grapevine                   | HM921404                  | HM921386 |
| <i>Xiphinema index</i>               | INVRM       | Trexenta, Sardinia province, Italy                 | grapevine                   | HM921405                  | HM921387 |
| <i>Xiphinema index</i>               | INVRM       | Trexenta, Sardinia province, Italy                 | grapevine                   | HM921406                  | HM921388 |
| 35. <i>Xiphinema insigne</i>         | MIYA1       | Miyazaki, Japan                                    | <i>Prunus</i> sp.           | *                         | KY816617 |
| 36. <i>Xiphinema israeliae</i>       | AR013       | Roufas province, Greece                            | wild olive                  | KJ802883                  | KY816618 |
| 37. <i>Xiphinema italiae</i>         | AR041       | Las Tres Villas, Almería province, Spain           | wild olive                  | KX244911                  | KY816619 |
| <i>Xiphinema italiae</i>             | AR091       | Puerto Real, Cádiz province, Spain                 | wild olive                  | KX244912                  | KY816620 |
| <i>Xiphinema italiae</i>             | TUNIS       | Sbitla, Kasserine, Tunisia                         | cultivated olive            | KX062674                  | KY816621 |
| <i>Xiphinema italiae</i>             | TUN11       | Sbiba, Kasserine, Tunisia                          | cultivated olive            | KX062677                  | KY816622 |
| <i>Xiphinema italiae</i>             | APUL        | Bari, Bari province, Italy                         | grapevine                   | *                         | KY816623 |
| <i>Xiphinema italiae</i>             | -           | Moca, Slovakia                                     | grapevine                   | FJ713153                  | FJ713151 |
| 38. <i>Xiphinema iznajarense</i>     | JAO25       | Iznájar, Córdoba province, Spain                   | cultivated olive            | KX244892                  | KY816624 |
| 39. <i>Xiphinema krugi</i>           | ACC47       | Sucre, Ciudad Quesada, Alajuela                    | Robust star-grass           | KX931061                  | KY816625 |
| <i>Xiphinema krugi</i>               | ACC13       | Santa Gertrudis. Grecia. Alajuela                  | Sugar-cane                  | KX931060                  | KY816626 |
| 40. <i>Xiphinema lambertii</i>       | -           | Bajnath, India                                     | <i>Terminalia bellirica</i> | -                         | HM163208 |
| 41. <i>Xiphinema luci</i>            | IAGRQ       | Benacazón, Sevilla province, Spain                 | rose                        | KP268965                  | KY816627 |
| 42. <i>Xiphinema lupini</i>          | H0050       | Hinojos, Huelva province, Spain                    | grapevine                   | KC567183                  | KY816628 |
| <i>Xiphinema lupini</i>              | 388GD       | Bollullos par del Condado, Huelva province, Spain  | grapevine                   | HM921352                  | KY816629 |
| <i>Xiphinema lupini</i>              | 388GD       | Bollullos par del Condado, Huelva province, Spain  | grapevine                   | *                         | KY816630 |
| 43. <i>Xiphinema macroacanthum</i>   | ITAL        | Brindisi, Italy                                    | cultivated olive            | *                         | KY816631 |
| 44. <i>Xiphinema macrodora</i>       | AR097       | Santa Mª de Trassiera, Córdoba, Spain              | wild olive                  | KU171044                  | KY816632 |
| 45. <i>Xiphinema madeirense</i>      | AR031       | Tarifa, Cádiz province, Spain                      | wild olive                  | KP268966                  | KP268978 |
| 46. <i>Xiphinema mengibarense</i>    | O3C04       | Mengíbar, Jaen province, Spain                     | Cultivated olive            | KX2448893                 | KY816633 |
| <i>Xiphinema mengibarense</i>        | O30V5       | Mengíbar, Jaen province, Spain                     | Cultivated olive            | KX2448894                 | KY816634 |
| 47. <i>Xiphinema meridianum</i>      | 11R16       | Sbitla, Kasserine, Tunisia                         | Cultivated olive            | KX062678                  | KY816635 |
| 48. <i>Xiphinema nuragicum</i>       | ST012       | Espejo, Córdoba province, Spain                    | grapevine                   | *                         | KY816636 |
| <i>Xiphinema nuragicum</i>           | AR054       | Medina Sidonia, Cádiz province, Spain              | wild olive                  | *                         | KY816637 |
| <i>Xiphinema nuragicum</i>           | ST106       | La Puebla de los Infantes, Sevilla province, Spain | cultivated olive            | *                         | KY816638 |
| <i>Xiphinema nuragicum</i>           | JAO28       | Antequera, Málaga province, Spain                  | cultivated olive            | *                         | KY816639 |
| <i>Xiphinema nuragicum</i>           | AR113       | Alcolea, Córdoba province, Spain                   | wild olive                  | *                         | KY816640 |
| 49. <i>Xiphinema opisthohysterum</i> | AR031       | Tarifa, Cádiz province, Spain                      | wild olive                  | KP268967                  | KY816641 |
| <i>Xiphinema opisthohysterum</i>     | 00418       | Andújar, Jaén province, Spain                      | grasses                     | JQ990040                  | KY816642 |
| <i>Xiphinema opisthohysterum</i>     | -           | Almonte, Huelva province, Spain                    | grapevine                   | JQ990032                  | JQ990053 |
| <i>Xiphinema opisthohysterum</i>     | -           | Andújar, Jaen province, Spain                      | grasses                     | JQ990040                  | JQ990054 |
| 50. <i>Xiphinema pachtaicum</i>      | PAJ40       | Jerez de la Frontera, Cádiz province, Spain        | grapevine                   | JQ990033                  | JQ990057 |
| <i>Xiphinema pachtaicum</i>          | PAIAS       | Córdoba, Córdoba province, Spain.                  | grapevine                   | HM921389                  | HM921369 |
| <i>Xiphinema pachtaicum</i>          | PA393       | Moriles, Córdoba province, Spain.                  | grapevine                   | HM921390                  | HM921370 |

| Nematode species                     | Sample code | Locality                                          | Host plant               | GenBank accession numbers |          |
|--------------------------------------|-------------|---------------------------------------------------|--------------------------|---------------------------|----------|
| <i>Xiphinema pachtaicum</i>          | PA393       | Moriles, Córdoba province, Spain.                 | grapevine                | HM921391                  | HM921371 |
| <i>Xiphinema pachtaicum</i>          | PAFRI       | Frigiliana, Málaga province, Spain.               | grapevine                | HM921392                  | HM921372 |
| <i>Xiphinema pachtaicum</i>          | PA401       | Jerez de la Fra., Cádiz province, Spain           | grapevine                | *                         | HM921373 |
| <i>Xiphinema pachtaicum</i>          | PA401       | Jerez de la Fra., Cádiz province, Spain           | grapevine                | HM921393                  | HM921374 |
| <i>Xiphinema pachtaicum</i>          | PA500       | Jerez de la Fra., Cádiz province, Spain           | grapevine                | HM921394                  | HM921375 |
| <i>Xiphinema pachtaicum</i>          | PA506       | Trebujena, Cádiz province, Spain                  | grapevine                | HM921395                  | HM921376 |
| <i>Xiphinema pachtaicum</i>          | PA484       | Bollullos par del Condado, Huelva province, Spain | grapevine                | HM921396                  | HM921378 |
| <i>Xiphinema pachtaicum</i>          | PARIO       | La Guardia, Logroño province, Spain               | grapevine                | HM921397                  | HM921379 |
| <i>Xiphinema pachtaicum</i>          | V1          | Palermo, Sicily, Italy                            | grapevine                | KX263184                  | KX263108 |
| <i>Xiphinema pachtaicum</i>          | CD230       | California, USA                                   | lemon                    | KX263181                  | KX263109 |
| <i>Xiphinema pachtaicum</i>          | XA69        | California, USA                                   | plum                     | KX263183                  | KX263110 |
| <i>Xiphinema pachtaicum</i>          | CD49        | California, USA                                   | plum                     | KX263182                  | KX263111 |
| <i>Xiphinema pachtaicum</i>          | V2          | Palermo, Sicily, Italy                            | olive                    | -                         | KX263112 |
| <i>Xiphinema pachtaicum</i>          | V3          | Palermo, Sicily, Italy                            | pomegranate              | -                         | KX263115 |
| 51. <i>Xiphinema parabrevicolle</i>  | XBRIN-      | Pantanagianni, Italy                              | Lentisc and marram grass | JQ990042                  | JQ990059 |
| 52. <i>Xiphinema parapachydermum</i> | H0018       | Hinojos, Huelva province, Spain                   | grapevine                | JQ990036                  | JQ990056 |
| 53. <i>Xiphinema parasimile</i>      | -           | Vinogradets, Bulgaria                             | grapevine                | -                         | KU250159 |
| 54. <i>Xiphinema peruvianum</i>      | -           | Brazil                                            | Coffeae Arabica          | -                         | AM086712 |
| <i>Xiphinema peruvianum</i>          | -           | Georgia, USA                                      | Orchard fruit            | -                         | AM086692 |
| 55. <i>Xiphinema pseudocoxi</i>      | AR095       | Alcaracejos, Córdoba province, Spain              | wild olive               | KX244915                  | KY816643 |
| 56. <i>Xiphinema pyrenaicum</i>      | ESMEN       | Cahors, Quercy province, France                   | grapevine                | GU725073                  | KY816644 |
| 57. <i>Xiphinema rivesi</i>          | CASLO       | Castillo de Locubín, Jaén province, Spain         | cherry tree              | JQ990037                  | KY816645 |
| <i>Xiphinema rivesi</i>              | 00518       | Moriles, Córdoba province, Spain                  | grapevine                | HM921357                  | KY816646 |
| <i>Xiphinema rivesi</i>              | ALGUA       | Alcala de Guadaira, Sevilla Province, Spain       | grapevine                | JQ990039                  | JQ990060 |
| <i>Xiphinema rivesi</i>              | CD1165      | Minnesota, Brooklyn Park, USA                     | grasses and shrubs       | KX263176                  | KX263100 |
| <i>Xiphinema rivesi</i>              | CD1715      | California, USA                                   | -                        | KX263140                  | KX263104 |
| <i>Xiphinema rivesi</i>              |             |                                                   |                          |                           | KX263102 |
| <i>Xiphinema rivesi</i>              |             |                                                   |                          |                           | KX263103 |
| 58. <i>Xiphinema robbinsi</i>        | 12R28       | Sbitla, Kasserine, Tunisia                        | cultivated olive         | KX062683                  | KY816647 |
| 59. <i>Xiphinema santos</i>          | H0136       | Rociana del condado, Huelva province, Spain       | grapevine                | JQ990030                  | JQ990055 |
| 60. <i>Xiphinema setariae</i>        | ACC09       | Pueblo Nuevo de Duacará. Guácimo. Limón           | banana                   | KX931066                  | KY816648 |
| <i>Xiphinema setariae</i>            | CD208       | Florida, USA                                      | -                        | -                         | KX263044 |
| 61. <i>Xiphinema simile</i>          | -           | Portugal                                          | -                        | -                         | AM086709 |
| <i>Xiphinema simile</i>              | -           | Slovakia                                          | <i>Juglans regia</i>     | -                         | AM086710 |
| <i>Xiphinema simile</i>              | -           | Cejkovice, Czech Republic                         | cherry                   | -                         | GU222425 |
| <i>Xiphinema simile</i>              | -           | Detkovice, Czech Republic                         | cherry                   | -                         | GU222426 |
| <i>Xiphinema simile</i>              | -           | Velke Pavlovice Czech Republic                    | apricot                  | -                         | GU222427 |
| <i>Xiphinema simile</i>              | -           | Serbia                                            | Unknown                  | -                         | AM086711 |
| <i>Xiphinema simile</i>              | -           | Velke Pavlovice, Czech republic                   | apricot                  | -                         | GU222427 |

| Nematode species                     | Sample code | Locality                                         | Host plant            | GenBank accession numbers |          |
|--------------------------------------|-------------|--------------------------------------------------|-----------------------|---------------------------|----------|
| 62. <i>Xiphinema sphaerocephalum</i> | AR063       | Coto Ríos, Jaén province, Spain                  | wild olive            | *                         | KY816649 |
| 63. <i>Xiphinema taylora</i>         | -           | Slovakia                                         | <i>J. regia</i>       | -                         | AM086702 |
| <i>Xiphinema taylora</i>             | -           | Slovakia                                         | <i>J. regia</i>       | -                         | AM086703 |
| 64. <i>Xiphinema turcicum</i>        | ST149       | San José del Valle, Cádiz province, Spain        | wild olive            | *                         | KY816650 |
| 65. <i>Xiphinema turdetanense</i>    | AR0015      | Sanlúcar de Barrameda, Cádiz province, Spain     | wild olive            | KC567186                  | KY816651 |
| 66. <i>Xiphinema vallense</i>        | AR0027      | Bolonia, Cádiz province, Spain                   | wild olive            | KP268960                  | KY816652 |
| <i>Xiphinema vallense</i>            | H00003      | Hinojos, Huelva province, Spain                  | cultivated olive      | KP268961                  | KY816653 |
| 67. <i>Xiphinema vuittenezi</i>      | -           | Slany, Czech Republic                            | Apple tree            | EF614265                  | EF614265 |
| 68. <i>Xiphinema</i> sp.             | P0011       | Sbitla, Kasserine, Tunisia                       | Cultivated olive      | KX062686                  | KY816654 |
| 69. <i>Xiphinema</i> sp. JPNH509     | -           | Chiba, Japan                                     | Ilex crenata          | -                         | AB604339 |
| <i>Xiphinema</i> sp. JPNH509         | -           | Chiba, Japan                                     | Ilex crenata          | -                         | AB604338 |
| 70. <i>Xiphinema</i> sp1 SAS2016     | CD44        | California, USA                                  | plum                  | KX263132                  | KX263093 |
| <i>Xiphinema</i> sp1 SAS2016         | CD50        | California, USA                                  | plum                  | KX263135                  | KX263086 |
| <i>Xiphinema</i> sp1 SAS2016         | CD91        | California, USA                                  | grape                 | KX263137                  | KX263090 |
| <i>Xiphinema</i> sp1 SAS2016         | CD95        | California, USA                                  | grape                 | KX263133                  | KX263091 |
| <i>Xiphinema</i> sp1 SAS2016         | CD96        | California, USA                                  | grape                 | KX263123                  | KX263089 |
| <i>Xiphinema</i> sp1 SAS2016         | CD139       | California, USA                                  | walnut                | KX263130                  | KX263092 |
| <i>Xiphinema</i> sp1 SAS2016         | XA13        | California, USA                                  | alfalfa               | KX263126                  | KX263097 |
| <i>Xiphinema</i> sp1 SAS2016         | XA19        | California, USA                                  | alfalfa               | KX263120                  | KX263099 |
| <i>Xiphinema</i> sp1 SAS2016         | XA26        | California, USA                                  | plum                  | KX263124                  | KX263101 |
| <i>Xiphinema</i> sp1 SAS2016         | XA65        | California, USA                                  | plum                  | KX263121                  | KX263085 |
| <i>Xiphinema</i> sp1 SAS2016         | XA100       | California, USA                                  | walnut                | KX263122                  | KX263088 |
| <i>Xiphinema tarjanense</i>          | -           | USA                                              | Orchard fruit         | -                         | AM086694 |
| 71. <i>Xiphinema</i> sp2 SAS2016     | CD152       | California, USA                                  | orange                | KX263167                  | KX263105 |
| 72. <i>Xiphinema</i> sp5 SAS2016     | XA88        | California, USA                                  | peach                 | -                         | KX263045 |
| Genus <i>Longidorus</i> spp.         |             |                                                  |                       |                           |          |
| 73. <i>Longidorus aetneus</i>        | CD1138      | Varenikovskaya, Krymsk, Krasnodar Terr., Russia  | Silver poplar         | KF242324                  | KY816655 |
| <i>Longidorus aetneus</i>            | CD1121      | Varenikovskaya, Krymsk, Krasnodar Terr., Russia  | <i>Populus</i> sp.    | KF242323                  | KY816656 |
| <i>Longidorus aetneus</i>            | CD1111      | Varenikovskaya, Krymsk, Krasnodar Terr., Russia  | <i>Salix fragilis</i> | KF242318                  | KY816657 |
| <i>Longidorus aetneus</i>            | CD1129      | Varenikovskaya, Krymsk, Krasnodar Terr., Russia  | <i>Acer tataricum</i> | KF242321                  | KY816658 |
| <i>Longidorus aetneus</i>            | CD1142      | Varenikovskaya, Krymsk, Krasnodar Terr., Russia  | <i>Salix alba</i>     | KF242322                  | KY816659 |
| 74. <i>Longidorus africanus</i>      | P00011      | Chott-mariem province, Tunisia                   | cultivated olive      | KX062665                  | KY816660 |
| 75. <i>Longidorus alvegus</i>        | ALNOR       | Andújar, Jaén province, Spain                    | black alder           | *                         | KY816661 |
| 76. <i>Longidorus andalusicus</i>    | J0172       | Sanlúcar de Barrameda, Cádiz province, Spain     | pickle weed           | JX445118                  | KY816662 |
| 77. <i>Longidorus apulus</i>         | BARLE       | Barletta, Bari province, Italy                   | artichoke             | AY601571                  | KY816663 |
| 78. <i>Longidorus artemisiae</i>     | CD1127      | Shestikhino, Myshkin district, Yaroslavl, Russia | <i>Poa</i> sp.        | KF242314                  | KY816664 |
| 79. <i>Longidorus asiaticus</i>      | LARGE       | Bari province, Italy                             | crape myrtle          | KR351254                  | KY816665 |
| 80. <i>Longidorus baeticus</i>       | M0121       | Montemayor, Córdoba province, Spain              | grapevine             | JX445106                  | KY816666 |

| Nematode species                      | Sample code | Locality                                            | Host plant                 | GenBank accession numbers |          |
|---------------------------------------|-------------|-----------------------------------------------------|----------------------------|---------------------------|----------|
| 81. <i>Longidorus closelongatus</i>   | 23CRE       | Mires, Heraklion Province, Crete, Greece            | grapevine                  | KJ802865                  | KY816667 |
| 82. <i>Longidorus crataegi</i>        | M0156       | Montemayor , Córdoba province, Spain                | grapevine                  | JX445114                  | KY816668 |
| <i>Longidorus crataegi</i>            | M0156       | Montemayor , Córdoba province, Spain                | grapevine                  | *                         | KY816669 |
| 83. <i>Longidorus cretensis</i>       | TOCRE       | Pentamodi, Heraklion province, Crete, Greece        | cultivated olive           | KJ802868                  | KY816670 |
| 84. <i>Longidorus distinctus</i>      | CD1128      | Pyatigorsk, Stavropol Territory, Russia             | <i>Salix sp.</i>           | KF242317                  | KY816671 |
| 85. <i>Longidorus euonymus</i>        | CD1118      | Bolshoy Vyas, Lunino district                       | <i>Asparagus cicer</i>     | KF242333                  | KY816672 |
| <i>Longidorus euonymus</i>            | CD1130      | Anapa, Anapa district, Krasnodar Territory, Russia  | <i>Juglans regia</i>       | KF242332                  | KY816673 |
| 86. <i>Longidorus fasciatus</i>       | M0063       | Monturque , Córdoba province, Spain                 | grapevine                  | JX445108                  | KY816674 |
| 87. <i>Longidorus helveticus</i>      | -           | Stari Ledinci, Serbia                               | Unknown                    | EF538753                  | EF538747 |
| <i>Longidorus helveticus</i>          | -           | Chodovlice, Czech republic                          | Sweet cherry               | JN627414                  | JN627416 |
| <i>Longidorus helveticus</i>          | -           | Silnicna, Czech republic                            | <i>Prunus avium L.</i>     | JN627415                  | JN627417 |
| 88. <i>Longidorus indalus</i>         | ST042       | Las Tres Villas, Almería province, Spain            | cultivated olive           | KT308854                  | KY816675 |
| 89. <i>Longidorus intermedius</i>     | CD1122      | Kamennomostsky, Adygeya, Russia                     | <i>Fagus orientalis</i>    | KF242312                  | KY816676 |
| 90. <i>Longidorus iranicus</i>        | GRECD       | Harakas province, Greece                            | grapevine                  | KJ802875                  | KY816677 |
| 91. <i>Longidorus iuglandis</i>       | H0183       | Bonares, Huelva province, Spain                     | grapevine                  | JX445104                  | KY816678 |
| 92. <i>Longidorus jonesi</i>          | MIY03       | Miyazaki, Japan                                     | <i>Prunus sp.</i>          | KF552069                  | KY816679 |
| 93. <i>Longidorus kuiperi</i>         | BOLOI       | Bolonia, Cádiz province, Spain                      | marram grass               | *                         | KY816680 |
| 94. <i>Longidorus laeovicapitatus</i> | ACC01       | La Virgen de Sarapiquí, Heredia, Costa Rica         | Sugar cane                 | KX136865                  | KY816681 |
| 95. <i>Longidorus leptcephalus</i>    | CD1136      | Potrosovo, Kozelsk district, Kaluga region, Russia  | common nettle              | KF242326                  | KY816682 |
| 96. <i>Longidorus lignosus</i>        | CD1124      | Sukko, Anapa district, Krasnodar, Territory, Russia | <i>Acer campestre</i>      | KF242345                  | KY816683 |
| 97. <i>Longidorus lusitanicus</i>     | J0212       | Sanlúcar de Barrameda, Cádiz province, Spain        | wild olive                 | KT308869                  | KY816684 |
| 98. <i>Longidorus macrodorus</i>      | JAO06       | La Grajuela (Córdoba, Spain)                        | cultivated olive           | KT308855                  | KY816685 |
| <i>Longidorus macrodorus</i>          | JAO06       | La Grajuela (Córdoba, Spain)                        | cultivated olive           | KT308856                  | KY816686 |
| 99. <i>Longidorus macrosoma</i>       | -           | Orth, Austria                                       | Unknown                    | EF538752                  | EF538746 |
| 100. <i>Longidorus magnus</i>         | M0130       | Hinojos, Huelva province, Spain                     | cultivated olive           | KX00000                   | KY816687 |
| <i>Longidorus magnus</i>              | M0079       | Monturque, Córdoba province, Spain                  | grapevine                  | KX00000                   | KY816688 |
| <i>Longidorus magnus</i>              | M0017       | Lucena, Córdoba province, Spain                     | grapevine                  | JX445113                  | KY816689 |
| <i>Longidorus magnus</i>              | J0164       | Jerez de la Frontera, Cádiz, Spain                  | grapevine                  | *                         | KY816690 |
| <i>Longidorus magnus</i>              | ST077       | Espiel, Córdoba province, Spain                     | cultivated olive           | *                         | KY816691 |
| <i>Longidorus magnus</i>              | JAO01       | Villaviciosa, Córdoba province, Spain               | cultivated olive           | *                         | KY816692 |
| <i>Longidorus magnus</i>              | JAO31       | Antequera, Málaga province, Spain                   | cultivated olive           | *                         | KY816693 |
| <i>Longidorus magnus</i>              | CASLO       | Castillo de Locubin, Granada province, Spain.       | cherry tree                | *                         | KY816694 |
| 101. <i>Longidorus onubensis</i>      | ST005       | Niebla (Huelva, Spain)                              | cultivated olive           | KT308857                  | KY816695 |
| 102. <i>Longidorus orientalis</i>     | -           | Murcia, Spain                                       | Grapevine                  | KP406931                  | KP406950 |
| <i>Longidorus orientalis</i>          | CD1553      | Arizona, USA                                        | <i>Phoenix dactylifera</i> | *                         | KP406952 |
| <i>Longidorus orientalis</i>          | CD1537      | California, USA                                     | <i>Phoenix dactylifera</i> | *                         | KP406957 |
| <i>Longidorus orientalis</i>          | R0044       | El Rocío, Huelva province, Spain                    | Gramineae                  | GU001823                  | KP406961 |
| <i>Longidorus orientalis</i>          | CD1562      | Khuzestan Province, Ahvaz, Iran                     | <i>Phoenix dactylifera</i> | KJ802877                  | KP406962 |
| <i>Longidorus orientalis</i>          | CD1563      | Khuzestan Province, Ahvaz, Iran                     | <i>P. dactylifera</i>      | -                         | KP406964 |



| Nematode species                        | Sample code | Locality                                         | Host plant               | GenBank accession numbers |          |
|-----------------------------------------|-------------|--------------------------------------------------|--------------------------|---------------------------|----------|
| <i>Longidorus orientalis</i>            | CD1564      | Khuzestan Province, Ahvaz, Iran                  | <i>P. dactylifera</i>    | -                         | KP406965 |
| <i>Longidorus orientalis</i>            | O44         | Heraklion Province, Crete, Greece                | grapevine                | KJ802877                  | KP406963 |
| <i>Longidorus orientalis</i>            | P28         | Alhama de Murcia, Spain                          | grapevine                | KP406931                  | KP406951 |
| <i>Longidorus orientalis</i>            | N10         | Bollullos par del Condado, Huelva, Spain         | grapevine                | KP406933                  | KP406949 |
| 103. <i>Longidorus persicus</i>         | ESMAE       | Gilan-e-Gharb, Kermanshah province, Iran         | rose                     | KT149799                  | KY816696 |
| 104. <i>Longidorus pisi</i>             | OIRAN       | Markazi province, Iran                           | apple tree               | JQ240274                  | KY816697 |
| 105. <i>Longidorus poessneckensis</i>   | -           | Velke Kapusany, Slovakia                         | Unknown                  | EF538751                  | EF538745 |
| <i>Longidorus poessneckensis</i>        | -           | Černé Voděrady, Czech Republic                   | <i>Quercus</i>           | EF538750                  | EF538744 |
| 106. <i>Longidorus pseudoelongatus</i>  | AR034       | Voutes province, Greece                          | cultivated olive         | KJ802870                  | KY816698 |
| <i>Longidorus pseudoelongatus</i>       | AR040       | Hersonisos province, Greece                      | cultivated olive         | KJ802871                  | KY816699 |
| 107. <i>Longidorus rubi</i>             | H0026       | Almonte, Huelva province, Spain                  | Pinus pinea              | JX445116                  | KY816700 |
| 108. <i>Longidorus silvestris</i>       | AR027       | Bolonia (Cádiz, Spain)                           | cultivated olive         | KT308859                  | KY816701 |
| 109. <i>Longidorus uroshis</i>          | -           | Velke Pole, Slovakia                             | Unknown                  | EF538754                  | EF614264 |
| 110. <i>Longidorus vallensis</i>        | AR055       | San José del Valle, Cádiz province, Spain        | wild olive               | KT308861                  | KY816702 |
| <i>Longidorus vallensis</i>             | M0012       | Cabra, Córdoba province, Spain                   | grapevine                | KT308862                  | KY816703 |
| 111. <i>Longidorus vineacola</i>        | AR031       | Tarifa, Cádiz province, Spain                    | wild olive               | KT308873                  | KY816704 |
| <i>Longidorus vineacola</i>             | AR113       | Alcolea, Córdoba province, Spain                 | wild olive               | *                         | KY816705 |
| <i>Longidorus vineacola</i>             | TRASI       | Córdoba province, Spain                          | cultivated olive         | *                         | KY816706 |
| <i>Longidorus vineacola</i>             | M0124       | Montemayor, Córdoba province, Spain              | Portuguese oak           | *                         | KY816707 |
| <i>Longidorus vineacola</i>             | M0124       | Montemayor, Córdoba province, Spain              | Portuguese oak           | *                         | KY816708 |
| <i>Longidorus vineacola</i>             | 0419B       | Andújar, Jaen province, Spain                    | wild olive               | *                         | KY816709 |
| <i>Longidorus vineacola</i>             | H0089       | Almonte, Huelva province, Spain                  | Stone pine               | *                         | KY81671  |
| <i>Longidorus vineacola</i>             | SR117       | Setenil de las Bodegas, Cádiz province, Spain    | cultivated olive         | *                         | KY816711 |
| <i>Longidorus vineacola</i>             | ST016       | El Saucejo, Sevilla province, Spain              | cultivated olive         | KT308872                  | KY816712 |
| 112. <i>Longidorus vinearum</i>         | AR097       | Santa Mª de Trassiera (Córdoba, Spain)           | wild olive               | KT308876                  | KY816713 |
| 113. <i>Longidorus wicuoalea</i>        | AR0101      | Bonares (Huelva, Spain)                          | wild olive               | KT308865                  | KY816714 |
| 114. <i>Longidorus sp.3</i>             | CD1112      | Natukhaevskaya, Krasnodar Territory, Russia      | <i>Prunus divaricata</i> | KF242335                  | KY816715 |
| 115. <i>Longidorus sp.4</i>             | CD1117      | Proletarka, Krasnosulinsk, Rostov region, Russia | <i>Salix babylonica</i>  | KF242334                  | KY816716 |
| 116. <i>Longidorus sp.6</i>             | CD876       | Point Reyes, Marin county, California, USA       | unknown                  | KF242328                  | KY816717 |
| <u>Genus <i>Paralongidorus</i> spp.</u> |             |                                                  |                          |                           |          |
| 117. <i>Paralongidorus bikanerensis</i> | BAMIR       | Bam, Kerman province, Iran                       | Palm                     | JN032584                  | KY816718 |
| 118. <i>Paralongidorus iranicus</i>     | NOURI       | Nour, Mazandaran province, Iran                  | Pine                     | JN032587                  | KY816719 |
| 119. <i>Paralongidorus litoralis</i>    | ZAHAR       | Zahara de los Atunes, Cádiz province, Spain      | mask tree                | EU026155                  | KY816720 |
| 120. <i>Paralongidorus paramaximus</i>  | ALGUC       | Alcalá de Guadaira, Sevilla province, Spain      | citrus                   | EU026156                  | KY816721 |
| <i>Paralongidorus paramaximus</i>       | ALGUC       | Alcalá de Guadaira, Sevilla province, Spain      | citrus                   | *                         | KY816722 |
| <i>Paralongidorus paramaximus</i>       | ALGUC       | Alcalá de Guadaira, Sevilla province, Spain      | citrus                   | *                         | KY816723 |

<sup>1</sup>For species identification see: 9,19,20,25,27,40,41,44,45,46,47,48,63,64,65,66,67,68,69 .

<sup>2</sup>(\*) Sequenced population but not deposited in GenBank database, since was identical to other sequences of the same species already deposited in GenBank.

<sup>3</sup>(-) Sequence not obtained or not performed.

**Table S2.** Molecular interspecific variability for *coxI* gene within the studied genera (*Xiphinema*, *Longidorus* and *Paralongidorus*).

|                                                | Number of sequences | Similarity <sup>1</sup> (%) | (%) Singletons | (%) Parsimony informative sites |
|------------------------------------------------|---------------------|-----------------------------|----------------|---------------------------------|
| <b>Genus <i>Xiphinema</i> spp.</b>             |                     |                             |                |                                 |
| <i>Xiphinema americanum</i> -group             |                     |                             |                |                                 |
| 1. <i>X. americanum</i> <sup>2</sup>           | 22                  | 78.82                       | 13.23          | 8.23                            |
| 2. <i>X. brevicolle</i> 'complex' <sup>3</sup> | 14                  | 76.67                       | 0.28           | 23.64                           |
| 3. <i>X. browni</i>                            | 3                   | 99.22                       | 0.53           | 0.00                            |
| 4. <i>X. californicum</i>                      | 18                  | 89.83                       | 5.08           | 5.08                            |
| 5. <i>X. floridae</i>                          | 2                   | 98.52                       | -              | -                               |
| 6. <i>X. incognitum</i>                        | 2                   | 86.61                       | -              | -                               |
| 7. <i>X. opisthohysterum</i>                   | 4                   | 95.49                       | 4.01           | 0.00                            |
| 8. <i>X. pachtaicum</i>                        | 21                  | 94.85                       | 1.63           | 1.90                            |
| 9. <i>X. peruvianum</i> <sup>5</sup>           | 2                   | 79.71                       | -              | -                               |
| 10. <i>X. rivesi</i>                           | 7                   | 78.09                       | 6.74           | 15.17                           |
| 11. <i>X. simile</i>                           | 6                   | 94.31                       | 4.95           | 0.74                            |
| 12. <i>X. vallense</i>                         | 2                   | 100.00                      | -              | -                               |
| 13. <i>Xiphinema</i> sp.1                      | 18                  | 82.26                       | 8.39           | 9.35                            |
| 14. <i>Xiphinema</i> sp. JPN-2014              | 2                   | 100.00                      | -              | -                               |
| <i>Xiphinema non-americanum</i> group          |                     |                             |                |                                 |
| 15. <i>X. adeno-hysterum</i>                   | 5                   | 88.40                       | 10.90          | 3.94                            |
| 16. <i>X. andalusiense</i>                     | 3                   | 97.20                       | 2.81           | 0.00                            |
| 17. <i>X. baetica</i>                          | 2                   | 96.90                       | -              | -                               |
| 18. <i>X. bakeri</i>                           | 2                   | 97.49                       | -              | -                               |
| 19. <i>X. celtiense</i>                        | 2                   | 93.97                       | -              | -                               |
| 20. <i>X. chambersi</i>                        | 8                   | 98.62                       | 0.92           | 0.46                            |
| 21. <i>X. costaricense</i>                     | 2                   | 99.11                       | -              | -                               |
| 22. <i>X. coxi europaeum</i>                   | 2                   | 93.10                       | -              | -                               |
| 23. <i>X. diversicaudatum</i>                  | 29                  | 91.80                       | 1.64           | 5.74                            |
| 24. <i>X. herakliense</i>                      | 3                   | 96.90                       | 2.62           | 0.00                            |
| 25. <i>X. hispidum</i>                         | 2                   | 95.95                       | -              | -                               |
| 26. <i>X. index</i>                            | 9                   | 98.34                       | 0.95           | -                               |
| 27. <i>X. italiae</i>                          | 6                   | 69.73                       | 9.93           | 20.34                           |
| 28. <i>X. krugi</i>                            | 2                   | 96.76                       | -              | -                               |
| 29. <i>X. lupini</i>                           | 3                   | 98.50                       | 1.50           | 0.00                            |

|                                     |    |        |      |       |
|-------------------------------------|----|--------|------|-------|
| 30. <i>X. mengibarense</i>          | 2  | 99.46  | -    | -     |
| 31. <i>X. nuragicum</i>             | 5  | 95.79  | 1.32 | 2.89  |
| 32. <i>X. setariae</i>              | 2  | 100.00 | -    | -     |
| <b>Genus <i>Longidorus</i> spp.</b> |    |        |      |       |
| 33. <i>L. aetnaeus</i>              | 5  | 99.37  | 0.63 | 0.00  |
| 34. <i>L. crataegi</i>              | 2  | 98.41  | -    | -     |
| 35. <i>L. euonymus</i>              | 2  | 100.00 | -    | -     |
| 36. <i>L. helveticus</i>            | 3  | 92.39  | 7.61 | 0.00  |
| 37. <i>L. macrodorus</i>            | 2  | 99.68  | -    | -     |
| 38. <i>L. magnus</i>                | 8  | 78.70  | 3.97 | 17.33 |
| 39. <i>L. orientalis</i>            | 17 | 78.78  | 0.72 | 20.50 |
| 40. <i>L. pseudoelongatus</i>       | 2  | 100.00 | -    | -     |
| 41. <i>L. poessneckensis</i>        | 2  | 84.62  | -    | -     |
| 42. <i>L. vallensis</i>             | 2  | 100.00 | -    | -     |
| 43. <i>L. vineacola</i>             | 9  | 68.91  | 7.05 | 24.04 |
| <b><i>Paralongidorus</i> sp.</b>    |    |        |      |       |
| 44. <i>P. paramaximus</i>           | 2  | 99.31  | -    | -     |

<sup>1</sup>Minimum similarity percentage

(-) Not determined

<sup>2</sup>*X. americanum* cf. not included

<sup>3</sup>*X. brevicolle* 'complex': *X. diffusum*, *X. taylori*, *X. brevicolle*, (not include accession AM086707 probably wrong identity) and not included in further analysis

**Table S3.** Molecular interspecific variability for D2-D3 region within the studied genera (*Xiphinema*, *Longidorus* and *Paralongidorus*).

|                                       | Number of sequences | Similarity (%) | (%) Singleton bases | (%) Parsimony informative sites |
|---------------------------------------|---------------------|----------------|---------------------|---------------------------------|
| <b>Genus <i>Xiphinema</i> spp.</b>    |                     |                |                     |                                 |
| <i>Xiphinema americanum</i> -group    |                     |                |                     |                                 |
| 1. <i>X. americanum</i>               | 20                  | 94.65          | 3.67                | 1.53                            |
| 2. <i>X. brevisicum</i>               | 2                   | 99.83          | -                   | -                               |
| 3. <i>X. brevicolle</i> *             | 21                  | 97.41          | 1.59                | 1.01                            |
| 4. <i>X. bricolensis</i>              | 2                   | 99.60          | -                   | -                               |
| 5. <i>X. browni</i>                   | 4                   | 100.00         | 0.00                | 0.00                            |
| 6. <i>X. californicum</i>             | 17                  | 95.69          | 2.72                | 1.59                            |
| 7. <i>X. citricolum</i>               | 6                   | 100.00         | 0.00                | 0.00                            |
| 8. <i>X. duriense</i>                 | 2                   | 99.58          | -                   | -                               |
| 9. <i>X. floridae</i>                 | 4                   | 100.00         | 0.00                | 0.00                            |
| 10. <i>X. georgianum</i>              | 9                   | 99.73          | 0.27                | 0.00                            |
| 11. <i>X. incertum</i>                | 5                   | 99.47          | 0.27                | 0.27                            |
| 12. <i>X. laevistriatum</i>           | 4                   | 99.76          | 0.24                | 0.00                            |
| 13. <i>X. opisthohysterum</i>         | 2                   | 100.00         | -                   | -                               |
| 14. <i>X. pachtaicum</i>              | 25                  | 96.51          | 1.90                | 1.27                            |
| 15. <i>X. parapachydermum</i>         | 6                   | 98.73          | 0.79                | 0.47                            |
| 16. <i>X. plesiopachtaicum</i>        | 3                   | 100.00         | 0.00                | 0.00                            |
| 17. <i>X. rivesi</i>                  | 23                  | 95.72          | 0.14                | 2.48                            |
| 18. <i>X. santos</i>                  | 3                   | 100.00         | 0.00                | 0.00                            |
| 19. <i>X. simile</i>                  | 7                   | 99.18          | 0.41                | 0.27                            |
| 20. <i>X. thornei</i>                 | 2                   | 99.73          | -                   | -                               |
| 21. <i>X. vallense</i>                | 3                   | 100.00         | 0.00                | 0.00                            |
| 22. <i>Xiphinema</i> sp. 1 SAS-2016   | 23                  | 98.40          | 0.89                | 0.89                            |
| 23. <i>Xiphinema</i> sp. 3 SAS-2016   | 2                   | 100.00         | -                   | -                               |
| 24. <i>Xiphinema</i> sp. 4 SAS-2016   | 2                   | 99.71          | -                   | -                               |
| <i>Xiphinema non-americanum</i> group |                     |                |                     |                                 |
| 25. <i>X. adeno-hysterum</i>          | 5                   | 99.02          | 0.84                | 0.14                            |
| 26. <i>X. andalusiense</i>            | 5                   | 99.49          | 0.51                | 0.00                            |
| 27. <i>X. baetica</i>                 | 6                   | 98.71          | 0.71                | 0.57                            |
| 28. <i>X. bakeri</i>                  | 5                   | 98.69          | 1.05                | 0.26                            |
| 29. <i>X. bareense</i>                | 3                   | 99.72          | 0.28                | 0.00                            |

|                               |    |        |      |      |
|-------------------------------|----|--------|------|------|
| 30. <i>X. basiri</i>          | 2  | 100.00 | -    | -    |
| 31. <i>X. belmontense</i>     | 3  | 100.00 | -    | -    |
| 32. <i>X. brasiliense</i>     | 2  | 100.00 | -    | -    |
| 33. <i>X. celtiense</i>       | 2  | 99.31  | -    | -    |
| 34. <i>X. chambersi</i>       | 9  | 97.44  | 0.71 | 0.71 |
| 35. <i>X. cohni</i>           | 2  | 97.00  | -    | -    |
| 36. <i>X. conurum</i>         | 4  | 99.39  | 0.60 | 0.00 |
| 37. <i>X. costaricense</i>    | 4  | 99.68  | 0.16 | 0.16 |
| 38. <i>X. coxi europaeum</i>  | 7  | 99.73  | 0.28 | 0.00 |
| 39. <i>X. cretense</i>        | 4  | 99.73  | 0.27 | 0.00 |
| 40. <i>X. dentatum</i>        | 2  | 99.87  | -    | -    |
| 41. <i>X. diversicaudatum</i> | 13 | 98.90  | 0.54 | 0.54 |
| 42. <i>X. elongatum</i>       | 4  | 99.61  | 0.00 | 0.39 |
| 43. <i>X. herakliense</i>     | 8  | 99.34  | 0.47 | 0.16 |
| 44. <i>X. hispidum</i>        | 4  | 99.15  | 0.85 | 0.00 |
| 45. <i>X. hunaniense</i>      | 9  | 97.93  | 0.39 | 1.68 |
| 46. <i>X. index</i>           | 19 | 99.42  | 0.29 | 0.29 |
| 47. <i>X. ingens</i>          | 2  | 99.59  | -    | -    |
| 48. <i>X. israeliae</i>       | 4  | 99.43  | 0.43 | 0.14 |
| 49. <i>X. italiae</i>         | 10 | 97.05  | 1.12 | 1.83 |
| 50. <i>X. krugi</i>           | 4  | 100.00 | 0.00 | 0.00 |
| 51. <i>X. lupini</i>          | 2  | 99.85  | -    | -    |
| 52. <i>X. macroacanthum</i>   | 2  | 96.56  | -    | -    |
| 53. <i>X. macrodora</i>       | 6  | 99.86  | -    | -    |
| 54. <i>X. mengibarense</i>    | 3  | 99.86  | 0.14 | 0.00 |
| 55. <i>X. meridianum</i>      | 3  | 99.73  | 0.41 | 0.00 |
| 56. <i>X. nuragicum</i>       | 10 | 100.00 | 0.00 | 0.00 |
| 57. <i>X. oleae</i>           | 3  | 99.32  | 0.68 | 0.00 |
| 58. <i>X. pseudocoxi</i>      | 2  | 99.67  | -    | -    |
| 59. <i>X. robbinsi</i>        | 3  | 99.38  | 0.41 | 0.00 |
| 60. <i>X. setariae</i>        | 6  | 98.86  | 0.85 | 0.28 |
| 61. <i>X. sphaerocephalum</i> | 2  | 99.47  | -    | -    |
| 62. <i>X. turcicum</i>        | 4  | 99.47  | 0.40 | 0.13 |
| 63. <i>X. turdetanense</i>    | 2  | 99.46  | -    | -    |
| 64. <i>X. vuittenezi</i>      | 5  | 99.47  | 0.26 | 0.26 |
| 65. <i>Xiphinema</i> sp. P11  | 3  | 100.00 | 0.00 | 0.00 |

**Genus *Longidorus* spp.**

|                              |    |        |      |      |
|------------------------------|----|--------|------|------|
| 66. <i>L. aetnaeus</i>       | 10 | 99.31  | 0.55 | 0.14 |
| 67. <i>L. africanus</i>      | 10 | 98.42  | 1.29 | 0.28 |
| 68. <i>L. andalusicus</i>    | 3  | 99.71  | 0.29 | 0.00 |
| 69. <i>L. artemisiae</i>     | 4  | 99.85  | 0.14 | 0.00 |
| 70. <i>L. alvegus</i>        | 4  | 99.02  | 0.84 | 0.14 |
| 71. <i>L. asiaticus</i>      | 3  | 99.06  | 0.80 | 0.00 |
| 72. <i>L. attenuatus</i>     | 3  | 100.00 | 0.00 | 0.00 |
| 73. <i>L. baeticus</i>       | 2  | 98.45  | -    | -    |
| 74. <i>L. caespiticola</i>   | 5  | 95.97  | 2.92 | 0.42 |
| 75. <i>L. carniolensis</i>   | 2  | 100.00 | -    | -    |
| 76. <i>L. cholevae</i>       | 2  | 100.00 | -    | -    |
| 77. <i>L. closelongatus</i>  | 5  | 100.00 | 0.00 | 0.00 |
| 78. <i>L. cretensis</i>      | 3  | 99.58  | 0.42 | 0.00 |
| 79. <i>L. danuvii</i>        | 2  | 100.00 | 0.00 | 0.00 |
| 80. <i>L. distinctus</i>     | 2  | 100.00 | 0.00 | 0.00 |
| 81. <i>L. elongatus</i>      | 19 | 98.70  | 1.00 | 0.29 |
| 82. <i>L. euonymus</i>       | 5  | 99.59  | 0.41 | 0.00 |
| 83. <i>L. helveticus</i>     | 5  | 99.46  | 0.54 | 0.00 |
| 84. <i>L. henanus</i>        | 2  | 99.73  | -    | -    |
| 85. <i>L. glycines</i>       | 3  | 98.97  | 1.03 | 0.00 |
| 86. <i>L. indalus</i>        | 3  | 99.70  | 0.30 | 0.00 |
| 87. <i>L. intermedius</i>    | 4  | 98.56  | 1.01 | 0.43 |
| 88. <i>L. iranicus</i>       | 5  | 99.86  | 0.13 | 0.00 |
| 89. <i>L. iuglandis</i>      | 2  | 100.00 | -    | -    |
| 90. <i>L. juvenilis</i>      | 2  | 99.03  | -    | -    |
| 91. <i>L. kuiperi</i>        | 2  | 100.00 | -    | -    |
| 92. <i>L. laevicapitatus</i> | 4  | 100.00 | 0.00 | 0.00 |
| 93. <i>L. leptocephalus</i>  | 5  | 99.57  | 0.29 | 0.00 |
| 94. <i>L. lignosus</i>       | 3  | 100.00 | -    | -    |
| 95. <i>L. magnus</i>         | 5  | 99.58  | 0.42 | 0.00 |
| 96. <i>L. macrodorus</i>     | 2  | 100.00 | -    | -    |
| 97. <i>L. macrosoma</i>      | 2  | 99.72  | -    | -    |
| 98. <i>L. oleae</i>          | 2  | 99.71  | 0.29 | 0.00 |
| 99. <i>L. onubensis</i>      | 2  | 100.00 | -    | -    |
| 100. <i>L. orientalis</i>    | 7  | 99.57  | 0.28 | -    |

|                                         |   |        |      |      |
|-----------------------------------------|---|--------|------|------|
| <i>101.L. persicus</i>                  | 2 | 100.00 | -    | -    |
| <i>102.L. pisi</i>                      | 3 | 99.58  | 0.42 | 0.00 |
| <i>103.L. pseudoelongatus</i>           | 4 | 99.86  | 0.14 | 0.00 |
| <i>104.L. poessneckensis</i>            | 2 | 100.00 | -    | -    |
| <i>105.L. silvestris</i>                | 2 | 100.00 | -    | -    |
| <i>106.L. vallensis</i>                 | 2 | 99.71  | -    | -    |
| <i>107.L. vineacola</i>                 | 5 | 98.30  | 1.55 | 0.14 |
| <i>108.L. vinearum</i>                  | 4 | 99.45  | 0.55 | 0.00 |
| <i>109.L. wicuolea</i>                  | 4 | 99.15  | 0.85 | 0.00 |
| <i>110.Longidorus</i> sp. 5 2014        | 2 | 99.73  | -    | -    |
| <i>111.Longidorus</i> sp. JH2014        | 3 | 100.00 | 0.00 | 0.00 |
| <b>Genus <i>Paralongidorus</i> spp.</b> |   |        |      |      |
| <i>112.P. rex</i>                       | 5 | 99.85  | 0.15 | 0.00 |

(-) Not determined

\**X. brevicolle* 'complex': *X. diffusum*, *X. taylori*, *X. brevicolle* and *X. inaequale*, not included in further analysis



**Table S4.** Molecular interspecific variability for *ITS* region within the studied genera (*Xiphinema*, *Longidorus* and *Paralongidorus*)\*.

| <b>Genus <i>Xiphinema</i> spp.</b> |                         |              |                   |                               |                                       |         |                           |                   |                               |      |      |
|------------------------------------|-------------------------|--------------|-------------------|-------------------------------|---------------------------------------|---------|---------------------------|-------------------|-------------------------------|------|------|
| <i>Xiphinema americanum</i> group  |                         |              |                   |                               | <i>Xiphinema non-americanum</i> group |         |                           |                   |                               |      |      |
|                                    | N° seq.                 | Similarity % | Singleton sites % | Parsimony informative sites % |                                       | N° seq. | Similarity %              | Singleton sites % | Parsimony informative sites % |      |      |
| 1.                                 | <i>X. americanum</i>    | 37           | 78.61             | 13.70                         | 5.68                                  | 14.     | <i>X. andalusiense</i>    | 6                 | 97.66                         | 0.49 | 1.65 |
| 2.                                 | <i>X. brevicolle</i>    | 7            | 92.10             | 2.46                          | 4.02                                  | 15.     | <i>X. baetica</i>         | 2                 | 98.92                         | 0.00 | 0.00 |
| 3.                                 | <i>X. browni</i>        | 3            | 100.00            | 0.00                          | 0.00                                  | 16.     | <i>X. bakeri</i>          | 3                 | 97.49                         | 1.99 | 0.00 |
| 4.                                 | <i>X. citricolum</i>    | 4            | 97.87             | 1.35                          | 0.14                                  | 17.     | <i>X. bernardi</i>        | 3                 | 99.49                         | 0.51 | 0.00 |
| 5.                                 | <i>X. floridae</i>      | 4            | 97.38             | 1.79                          | 0.07                                  | 18.     | <i>X. brasiliense</i>     | 2                 | 89.21                         | -    | -    |
| 6.                                 | <i>X. georgianum</i>    | 8            | 96.78             | 1.75                          | 1.33                                  | 19.     | <i>X. celtiense</i>       | 2                 | 96.73                         | -    | -    |
| 7.                                 | <i>X. laevistriatum</i> | 4            | 98.67             | 0.62                          | 0.00                                  | 20.     | <i>X. chambersi</i>       | 11                | 87.22                         | 6.47 | 3.99 |
| 8.                                 | <i>X. inaequale</i>     | 2            | 79.15             | -                             | -                                     | 21.     | <i>X. conurum</i>         | 2                 | 98.56                         | -    | -    |
| 9.                                 | <i>X. oxycaudatum</i>   | 2            | 100.00            | 0.00                          | 0.00                                  | 22.     | <i>X. costaricense</i>    | 4                 | 93.49                         | 4.43 | 0.55 |
| 10.                                | <i>X. rivesi</i>        | 9            | 93.02             | 1.98                          | 4.10                                  | 23.     | <i>X. coxi europaeum</i>  | 3                 | 100.00                        | 0.00 | 0.00 |
| 11.                                | <i>X. pachticum</i>     | 3            | 91.32             | 1.30                          | 0.00                                  | 24.     | <i>X. diversicaudatum</i> | 4                 | 96.57                         | 1.55 | 1.33 |
| 12.                                | <i>X. santos</i>        | 2            | 100.00            | -                             | -                                     | 25.     | <i>X. herakliense</i>     | 3                 | 99.22                         | 0.67 | 0.00 |
| 13.                                | <i>X. simile</i>        | 2            | 100.00            | -                             | -                                     | 26.     | <i>X. hunaniense</i>      | 2                 | 97.73                         | -    | -    |
|                                    |                         |              |                   |                               |                                       | 27.     | <i>X. index</i>           | 5                 | 99.03                         | 0.68 | 0.19 |
|                                    |                         |              |                   |                               |                                       | 28.     | <i>X. ingens</i>          | 2                 | 98.85                         | -    | -    |
|                                    |                         |              |                   |                               |                                       | 29.     | <i>X. insigne</i>         | 2                 | 94.86                         | -    | -    |
|                                    |                         |              |                   |                               |                                       | 30.     | <i>X. italiae</i>         | 8                 | 89.91                         | 5.23 | 2.88 |
|                                    |                         |              |                   |                               |                                       | 31.     | <i>X. iznajareense</i>    | 2                 | 99.09                         | -    | -    |
|                                    |                         |              |                   |                               |                                       | 32.     | <i>X. krugi</i> type A    | 2                 | 94.12                         | -    | -    |
|                                    |                         |              |                   |                               |                                       | 33.     | <i>X. krugi</i> type B    | 3                 | 90.26                         | 6.46 | 0.00 |
|                                    |                         |              |                   |                               |                                       | 34.     | <i>X. krugi</i> type C    | 5                 | 93.03                         | 4.44 | 0.89 |
|                                    |                         |              |                   |                               |                                       | 35.     | <i>X. macrodora</i>       | 3                 | 99.42                         | 0.58 | 0.00 |
|                                    |                         |              |                   |                               |                                       | 36.     | <i>X. mengibareense</i>   | 2                 | 97.72                         | -    | -    |
|                                    |                         |              |                   |                               |                                       | 37.     | <i>X. nuragicum</i>       | 3                 | 99.70                         | 0.19 | 0.00 |
|                                    |                         |              |                   |                               |                                       | 38.     | <i>X. oleae</i>           | 2                 | 99.55                         | -    | -    |
|                                    |                         |              |                   |                               |                                       | 39.     | <i>X. pseudocoxi</i>      | 2                 | 97.15                         | -    | -    |
|                                    |                         |              |                   |                               |                                       | 40.     | <i>X. setariae</i>        | 3                 | 99.16                         | 0.82 | 0.00 |
|                                    | N°                      | Conserved    | Singleton         | Parsimony                     |                                       |         |                           |                   |                               |      |      |

|                                    | seq. | sites % | sites % | informative sites % |
|------------------------------------|------|---------|---------|---------------------|
| <b>Genus <i>Longidorus</i></b>     |      |         |         |                     |
| 41. <i>L. africanus</i>            | 2    | 98.06   | -       | -                   |
| 42. <i>L. arthensis</i>            | 2    | 99.56   | -       | -                   |
| 43. <i>L. asiaticus</i>            | 2    | 99.12   | -       | -                   |
| 44. <i>L. biformis</i>             | 3    | 84.59   | 4.20    | 9.11                |
| 45. <i>L. caespiticola</i>         | 2    | 99.75   | -       | -                   |
| 46. <i>L. diadecturus</i>          | 2    | 98.86   | -       | -                   |
| 47. <i>L. elongatus</i>            | 4    | 99.31   | 0.49    | 0.00                |
| 48. <i>L. euonymus</i>             | 2    | 99.99   | -       | -                   |
| 49. <i>L. glycines</i>             | 3    | 92.73   | 4.69    | 0.00                |
| 50. <i>L. indalus</i>              | 2    | 97.71   | -       | -                   |
| 51. <i>L. iranicus</i>             | 2    | 99.80   | -       | -                   |
| 52. <i>L. kuiperi</i>              | 13   | 93.13   | 1.74    | 4.97                |
| 53. <i>L. laevicapitatus</i>       | 4    | 99.34   | 0.33    | 0.11                |
| 54. <i>L. macrodorus</i>           | 2    | 99.49   | -       | -                   |
| 55. <i>L. orientalis</i>           | 2    | 96.92   | 0.40    | 1.60                |
| 56. <i>L. onubensis</i>            | 2    | 100.00  | -       | -                   |
| 57. <i>L. pius</i>                 | 8    | 99.86   | 0.00    | 0.13                |
| 58. <i>L. raskii</i>               | 2    | 99.24   | -       | -                   |
| 59. <i>L. vallensis</i>            | 2    | 97.08   | -       | -                   |
| 60. <i>L. vinearum</i>             | 2    | 100.00  | -       | -                   |
| 61. <i>L. wicuolea</i>             | 3    | 99.46   | 0.40    | 0.00                |
| 62. <i>Longidorus</i> sp. JH2014   | 2    | 100.00  | -       | -                   |
| 63. <i>Longidorus</i> sp. M30      | 2    | 99.01   | -       | -                   |
| <b>Genus <i>Paralongidorus</i></b> |      |         |         |                     |
| 64. <i>P. rex</i>                  | 4    | 99.43   | 0.85    | 0.00                |

\*Some sequences of *X. diversicaudatum* have been corrected following Chizhov *et al.*<sup>18</sup>

**coxI phylonetic tree Newick format.** Phylogenetic relationships within Longidoridae. Bayesian 50% majority rule consensus tree as inferred from the analysis of the partial coxI sequence alignment under a TrN + I+ G model. Posterior probabilities more than 0.70 are given for appropriate clades.

(KC618473Helachista:0.9965429,KP718973\_Rstriaticeps:0.6348314,((((((((((nemv53Xadenohysterum\_coi:0.02323174,nemn42Xadenohysterum\_coi:0.04442051):0.03462923,(AR86adenohystherum\_t9:0.02441121,NBTadenohystherum\_AA74:0.02143105):0.01531369,ar78adenohystherum\_P6:0.04497179):0.04875309):0.2324454,(nemM51XitaliaeAR41:0.1722289,(APULIA\_ITALIAE:0.08117989,FJ713151XiphinematidaeITA:0.08723101):0.1084252):0.1594631,(nemT45XitaliaeAR91:0.1109185,(Q44italiae\_tunez:0.02038836,R10italiae\_tunez:0.04536965):0.08883677):0.1655259):0.1725677,J126Xcohnii:0.2808372,708Xhispanum:0.2669905,(nem875Xhispidum:0.0346082,nemU75Xhispidum:0.02400078):0.3062302,(Xceltiense\_ar82:0.07003489,ar83Xceltiense:0.04415578):0.1903435,(K32Xmengibarensis:0.002395316,Xmengibarensis\_K42:0.008163319):0.5238048):0.103768,Xiznajarensis\_JAO25\_U50:0.3134576):0.1290071,N41Xpyrenaicum:0.316702,N40Xsphaerocephalum:0.2617255,(((nemL68\_Xnuragicum\_ST12C:0.002950092,JAO28Xnuragicum:0.002681987):0.01108944,(XnuragicumAR113:0.03190949,(AR54Xnuragicum:0.002460877,ST106Xnuragicum:0.002595045):0.0325636):0.02782069):0.2828854,((NEMn30\_Xherakliense\_oleaster18:0.004528226,nemN29X\_herakliense\_oleaster17:0.0278936,NEMM64X\_herakliense\_oleaster8:0.002248172):0.2218904,nemN28X\_israeliae\_AR16delgadoG:0.5221968):0.1861949):0.1843163):0.1438582,(XconurumST45V\_NEMN4\_nuevo:0.4807968,Xmeridianum\_q31:0.30496):0.09090819,XrobbinsinermZ21:0.5752856):0.1806537,(((X\_belmontense\_mouchoDario:0.3492614,(AR20nemL26Xcoxiueuropeum:0.03020569,H27Xcoxiueuropaeum:0.03202631):0.2048132):0.1273966,EU781537Xiphinematidematatum:0.5031269):0.1167588,(((ar93andalusiense\_t60:0.01180015,(419andalusiense\_o57:0.005733587,ar108andalusiense\_v14:0.01005144):0.02095353):0.2935354,(nem770Xbaetica\_coi:0.02442197,nem791Xbaetica\_coi:0.02705422):0.07283846,H59Xgersoni:0.08074309):0.1785847):0.05074762,JAO47\_MACRODORA\_NEMZ11:0.2309812):0.1256444,Xcadavalense\_st77\_p49:0.2135329,Italy\_Xmacroanthum\_aa54:0.3368099,((((((KF292284Xiphinematidiversicaudat:0.002351812,KF292285Xiphinematidiversicaudat:0.002484021,KF292286Xiphinematidiversicaudat:0.002343647,KF292287Xiphinematidiversicaudat:0.002352577,KF292288Xiphinematidiversicaudat:0.00264783,KF292289Xiphinematidiversicaudat:0.00320051,KF292290Xiphinematidiversicaudat:0.002387069,KF292291Xiphinematidiversicaudat:0.002435328,KF292292Xiphinematidiversicaudat:0.005807669,(KF292293Xiphinematidiversicaudat:0.002399442,KF292294Xiphinematidiversicaudat:0.005859068):0.00601303):0.006742832,(JQ780331Xiphinematidiversicaudat:0.002246298,EF538749Xiphinematidiversicaudat:0.005376788):0.00535917):0.01297236,(KF292295Xiphinematidiversicaudat:0.002451813,KF292296Xiphinematidiversicaudat:0.002426701,KF292297Xiphinematidiversicaudat:0.002387624):0.008733526,KF292298Xiphinematidiversicaudat:0.002406784,KF292299Xiphinematidiversicaudat:0.002443191,KF292302Xiphinematidiversicaudat:0.00580435,KF292300Xiphinematidiversicaudat:0.005855249,KF292301Xiphinematidiversicaudat:0.00950027,((KF292304Xiphinematidiversicaudat:0.002373756,KF292303Xiphinematidiversicaudat:0.002467526):0.01439617,GU222423Xiphinematidiversicaudat:0.007884835):0.008663025):0.008865756,(JQ780332Xiphinematidiversicaudat:0.002286925,JQ780333Xiphinematidiversicaudat:0.002244985,GU222422Xiphinematidiversicaudat:0.0021879):0.01561524):0.01194666,(JQ780330Xiphinematidiversicaudat:0.002357271,GU222421Xiphinematidiversicaudat:0.002434923):0.009106993):0.1808502,(KF292305Xiphinematidiversicaudat:0.004714711,KF292306Xiphinematidiversicaudat:0.01486429):0.07421353):0.1613755,(nemP58Xcretense\_COI:0.3895626,(HM921380Xiphinematidiversicaudat:0.002213138,HM921381Xiphinematidiversicaudat:0.002443212,HM921383Xiphinematidiversicaudat:0.002436054,HM921384Xiphinematidiversicaudat:0.002334589,HM921385Xiphinematidiversicaudat:0.002315738,HM921386Xiphinematidiversicaudat:0.002337561,HM921387Xiphinematidiversicaudat:0.005401451,HM921388Xiphinematidiversicaudat:0.002260069,HM921382Xiphinematidiversicaudat:0.005539164):0.4004788):0.1234915,Xpseudocoxi\_ar95:0.288131,AR15Xturdetanense:0.3270409):0.1617674,(((KU764412Xiphinematidiversicaudat:0.002352217,KU764413Xiphinematidiversicaudat:0.002439921,KU764414Xiphinematidiversicaudat:0.002432345,KU764415Xiphinematidiversicaudat:0.002488717,KU764416Xiphinematidiversicaudat:0.005675138,KU764417Xiphinematidiversicaudat:0.006055713,KU764418Xiphinematidiversicaudat:0.005786994,KU764419Xiphinematidiversicaudat:0.005585411):0.2982692,(KX263044Xiphinematidiversicaudat:0.002800263,setariae\_ac56:0.002734007):0.7724071):0.1126419,(((Xinsigne\_cementerioJapom:0.3274354,((lupini\_nem722:0.00206226,nem723lupini:0.002024357):0.006555245,nem865\_LUPINI:0.0187705):0.337864):0.1230506,XSPTUNEZ:0.2969175):0.178997,Xtutricum\_ST149:0.4108596):0.14295):0.04389835):0.0837731):0.0885848,((XKRUGI\_AB19:0.03255635,XKRUGIR80:0.02341312):0.4912763,(ACC61xCOSTARICENSE:0.01298203,ACC46xCOSTARICENSE:0.00408777):0.5014219):0.174966):0.06277527,(((v89Pparamaximus:0.002175349,v91Pparamaximus:0.002193049,E89Pparamaximus:0.002232569):0.4029746,COX1\_PLITO:0.4573376):0.149335,PiranicusnemE80:0.2897602):0.4495109,(KX263045Xiphinematidiversicaudat:0.426085,LjonesiL5:0.80298):0.1603869,(((nemo61LalvegusDIFERENTEanterio:0.3848032,((Lcloselongatus:0.2106982,(LkuiperiZ:0.

5633112,(Lmoesicus100:0.181209,(NEMN23Lpseudolongatus:0.002169106,NEMN24Lpseudolongatus:0.002073607):0.2336349):0.1726696):0.1883645):0.146142,(LcretensismemO45:0.2104319,CD1117Longidorussp4HR1SB439:0.1988107):0.2156916):0.2370033):0.09664141,((CD1111LaetnaeusHR1SB442:0.002548526,CD1143LaetnaeusHR1SB444:0.002569358,CD1129LaetnaeusHR1SB445:0.002490262,CD1138LaetnaeusHR1SB446:0.006160113,CD1108LaetnaeusHR1SB441:0.005560582):0.1858626,CD1119LeptocephalusHR1SB4:0.4101035):0.2317798,((CD1118LeuonymusHR1SB410:0.002461023,CD1130LeuonymusHR1SB443:0.002589172):0.3181338,nemN64LapulusBurletta:0.2977682):0.1365054,LindalusnemM47:0.5004061,CD1112Longidorussp3HR1SB409:0.5132525,Lpersicus:0.6479486):0.1340517,((NEMC81Lbaeticus:0.2393001,(LmacroderusnemV33:0.003646684,LmacroderusnemV4:0.008829639):0.3384303,LfasciatusNEMF25:0.329179):0.09411689):0.1170235,(nemN62Landalusicus:0.2620771,(KP406949LongidorusorientalisN1:0.002785276,KP406950LongidorusorientalisN1:0.002865979,KP406951LongidorusorientalisP2:0.002746057):0.1110561,((KP406952LongidorusorientalisCD:0.002776491,KP406953LongidorusorientalisCD:0.002740524,KP406954LongidorusorientalisCD:0.002880949,KP406955LongidorusorientalisCD:0.002840653):0.02953317,KP406956LongidorusorientalisCD:0.03507444,((KP406957LongidorusorientalisCD:0.002897674,KP406958LongidorusorientalisCD:0.002793328,KP406959LongidorusorientalisCD:0.002853263,KP406960LongidorusorientalisCD:0.002805676):0.006525554,KP406961LongidorusorientalisR4:0.003872311):0.01100494,KP406962LongidorusorientalisCD:0.002844225,KP406963LongidorusorientalisO4:0.002910205,KP406964LongidorusorientalisCD:0.002957754,KP406965LongidorusorientalisCD:0.00688595):0.2100842):0.05956746):0.1602006):0.222198):0.1170247,(((M156v23Lcrataegi:0.008554521,Lcrataegim156:0.02077787):0.3434466,LlusitanicusnemK2:0.2972574):0.1084609,(((jao31magnus:0.04094327,m130Lmagnus:0.07146728):0.09939742,(castilloMagnus:0.004493309,M79MAGNUS:0.0023477,M17MAGNUS:0.002845582,J164MAGNUS:0.007867522):0.1240988,(ST77MAGNUS:0.002379036,JAO1MAGNUS:0.002354669):0.1545686):0.1736596,LvinearumnemU69:0.2329601):0.08778895,Lonubensisnemw31:0.3565027):0.1246609,((st16vineacolaJB3:0.08660072,AR31vineacolaJB3:0.1684391,ST117vineacolaCOIF:0.1604709,(TRASIERRAvineacolaCOIF:0.1082963,(419bvineacola:0.13077,(M124JB3vineacola:0.002263904,M124Lvineacola:0.002262322):0.09155735):0.1048071):0.05216688):0.1063863,(F23vineacolaCOIF:0.002144992,H89Lvineacola:0.002143855):0.1754024):0.1406868,(LsilvestrisnemX11:0.2261833,LwicuoleanemW16:0.2960614):0.3119236):0.09852643):0.0784343):0.05182939,nemE61Liuglandis:0.4459177):0.1458026,((LvallensisN35:0.002302574,LSPXm12\_VALLENSIS:0.002341827):0.3399111,LrubiH26:0.4488914):0.2001546,((CD1127LartemisiaeHr1SB414:0.2645588,(CD1122LintermediusHR1SB447:0.404661,EF614264LongidorusuroshisfromS:0.3358539):0.1082117):0.1665634,(CD1128LdistinctusHr1SB413:0.3370891,CD876Longidorusp6HR1SB438:0.481975):0.1621367):0.08724491):0.07645721,((EF538744Longidoruspoessneckens:0.2420956,EF538745Longidoruspoessneckens:0.1370286):0.2261627,(((EF538747Longidorushelveticusfr:0.005710275,JN627417\_Lhelveticus:0.007209524):0.04673959,JN627416\_Lhelveticus:0.07102129):0.4307002,EF538746Longidorusmacrosomafro:0.5231104):0.1458879,CD1120LlignosusHR1SB411:0.4036077):0.1153676):0.1845633,(LpsiH57:0.5181071,LasiaticusnemJ85:0.672405):0.2135252,africanus:0.5683882,PbikanerensisE79:0.5677614,Llaevicapitatus:0.6068479):0.0995916,(((KU250158Xiphinemabrowniisolate:0.002695704,GU222424XiphinemabrowniPK\_NSB1:0.004856798):0.004855232,AM086708Xiphinemasimilelovaki:0.008484221):0.335738,KU250159Xiphinemaparasimileiso:0.5010631):0.3828198,(KP268979Xiphinemabrevisicumclo:0.4273971,(KX263117Xiphinemasimileisolate:0.01123059,AM086711Xiphinema:0.02535791,(AM086710Xiphinema:0.002508063,AM086709XiphinemacafamericanumR:0.002272574,GU222425XiphinemasimileSC:0.002475282):0.00535519,GU222426XiphinemasimileSD:0.002529635,GU222427XiphinemasimileSVP:0.01226633):0.05707586):0.9366808):0.1931083):0.2496275):0.1690903,(Xduriense\_ST2C:0.6025919,(XopisthoysterumAR31:0.02253686,(Xopisthoysterum418\_I94:0.005031467,JQ990054Xiphinemaopisthoyster:0.002208151,JQ990053Xiphinemaduriensevouch:0.002066856):0.03439347):0.4811346):0.2050422,((((((nemk43Xluci\_coi:0.1231239,(KX263102Xiphinemarivesiisolate:0.002581664,KX263103Xiphinemarivesiisolate:0.002437781):0.1650824,(AM086696Xiphinemafloridaeflori:0.01959354,AM0866972Xiphinemarivesiarkans:0.006107392):0.285997,AM086712Xiphinemaperuvianumbra:0.424887):0.09523526):0.09872031,KX263105Xiphinemasp2SAS2016iso:0.1587265):0.06018926,((((((KX263065Xiphinemaamericanumiso:0.002683438,KX263066Xiphinemacalifornicum:0.005903488):0.01381376,KX263067Xiphinemacalifornicum:0.03161097):0.00993245,(KX263068Xiphinemacalifornicum:0.00250344,KX263069Xiphinemacalifornicum:0.004972248,KX263070Xiphinemacalifornicum:0.002374918,KX263071Xiphinemacalifornicum:0.005644185,KX263072Xiphinemacalifornicum:0.002434865,KX263074Xiphinemacalifornicum:0.01306358,KX263073Xiphinemacalifornicum:0.0205961):0.013432):0.0295258,KX263082Xiphinemacalifornicum:0.00824278,KX263083Xiphinemacalifornicum:0.009073921):0.008592988,KX263081Xiphinemacalifornicum:0.009284544):0.009496891,KX263080Xiphinemacalifornicum:0.006266006):0.008806513,KX263075Xiphinemacalifornicum:0.002279975,KX263076Xiphinemacalifornicum:0.002380151,KX263077Xiphinemacalifornicum:0.002341786,KX263078Xiphinemacalifornicum:0.002182207,KX263079Xiphinemacalifornicum:0.002182207,KX263079Xiphinemacalifornicum:0.002182207

mi:0.00241001):0.1262001,((((((KX263084Xiphinemasp1SAS2016iso:0.007920144,KX263085Xiphine  
masp1SAS2016iso:0.003862186):0.02287405,KX263086Xiphinemasp1SAS2016iso:0.03657544):0.0624  
14,(((KX263087Xiphinemasp1SAS2016iso:0.005538462,KX263088Xiphinemasp1SAS2016iso:0.00273  
0288,KX263093Xiphinemasp1SAS2016iso:0.01399163,KX263091Xiphinemasp1SAS2016iso:0.005781  
035,(KX263092Xiphinemasp1SAS2016iso:0.007768696,(KX263094Xiphinemasp1SAS2016iso:0.00249  
9211,1068088114KX263096Xiphinemasp1:0.002388471,KX263097Xiphinemasp1SAS2016iso:0.00247  
0585,KX263098Xiphinemasp1SAS2016iso:0.002350728,KX263099Xiphinemasp1SAS2016iso:0.00244  
2423,KX263095Xiphinemasp1SAS2016iso:0.002566347):0.006783657):0.00684099):0.005867298,KX2  
63089Xiphinemasp1SAS2016iso:0.002937762):0.006224405,KX263090Xiphinemasp1SAS2016iso:0.00  
2907766):0.01892058):0.02544604,AM086694Xiphinematarjanenseflo:0.02302318):0.09640226,106808  
8124KX263101Xiphinemasp1:0.1232628):0.07751839,KX263104Xiphinemarivesiisolate:0.1751415,((C  
astillodelocubinxrivesi:0.002549251,518Xrivesi:0.002368117):0.004670033,JQ990060Xiphinemarivesi  
oucher:0.006043402,KX263100Xiphinemarivesiisolate:0.06028306):0.1559968):0.07858703):0.00255335  
7,(KX263046Xiphinemaamericanumiso:0.002454481,KX263060Xiphinemaamericanumiso:0.002556204,  
KX263061Xiphinemaamericanumiso:0.002499852,KX263062Xiphinemaamericanumiso:0.002535819,K  
X263063Xiphinemaamericanumiso:0.002507163,KX263051Xiphinemaamericanumiso:0.002644576,KX  
263052Xiphinemaamericanumiso:0.002545722,KX263055Xiphinemaamericanumiso:0.002573756,KX2  
63056Xiphinemaamericanumiso:0.002529109,KX263057Xiphinemaamericanumiso:0.002499919,KX26  
3047Xiphinemaamericanumiso:0.01342673,KX263058Xiphinemaamericanumiso:0.002500699,(KX2630  
49Xiphinemaamericanumiso:0.003399435,KX263050Xiphinemaamericanumiso:0.002528067):0.007339  
121,KX263053Xiphinemaamericanumiso:0.006426677,KX263054Xiphinemaamericanumiso:0.0028186  
94,AM086690Xiphinemaamericanumsou:0.005729309,AM086689XiphinemapfamericanumR:0.0023488  
56,AM086691XiphinemapfamericanumR:0.01797828):0.09401317,(((KX263064Xiphinemaamericanumi  
so:0.06605315,AM086692Xiphinemapervianumgeo:0.06972404):0.02926183,AY382608\_americanum\_  
complete:0.0300184):0.02212563,AM086693Xiphinemapacitricolumflo:0.04433387):0.05244547):0.12253  
82,JQ990055Xiphinemasantosvoucher:0.1566116,AM086695Xiphinemapgeorgianumflo:0.2897389):0.11  
82643,JQ990059Xiphinemaparabrevicoll:0.3423742):0.05580948,(((3HM163206Xiphinemapbrevicollum  
B:0.002353201,(AM086702Xiphinemataylori:0.002530518,117306895embAM086703Xiphinemat:0.002  
314691):0.005683575):0.1212151,(KX263106Xiphinemapbrevicolleiso:0.002355752,KX263107Xiphine  
mapbrevicolleiso:0.002442416):0.146063):0.1396046,((AB675669Xiphinemapbrevicolle:0.002381644,AB  
675671Xiphinemapbrevicolle:0.005608013,AB604337Xiphinemapbrevicolle:0.002346109,AB675670Xiph  
inemapbrevicolle:0.005628651,(AM086698Xiphinemapdiffusumbrazi:0.00229889,AM086699Xiphinemapdi  
ffusumbrazi:0.002329927,117306889embAM086700Xiphinemapad:0.005614351):0.02529528,AM086701  
Xiphinemapdiffusumchina:0.01583555):0.008220791):0.04650781,(AB675672Xiphinemapbrevicolle:0.002  
321358,AB675673Xiphinemapbrevicolle:0.002289413):0.07282584):0.08236114):0.09097742,(AM08670  
7Xiphinemapbrevicollebra:0.2873018,(AM086705Xiphinemapmaincognitumchi:0.1211606,AM086706Xiphin  
emapmaincognitumchi:0.223014):0.1541364):0.1093455,((AB604338XiphinemaspJPNHS09COI:0.0027134  
44,AB604339XiphinemaspJPNHS09:0.0026529):0.2743469,HM163207XiphinemapinaequaleHP:0.28950  
01):0.0781449):0.1670318,AM086704XiphinemapfamericanumR:0.2204155):0.1078772,HM163208Xip  
hinemalambertiiXL:0.09960952):0.2513957,KP268978Xiphinemapmadeirenselco:0.7123316,(nemN53\_X  
vallense:0.002343751,nemL59\_Xvallense:0.002275381):0.9104469):0.5276566,(((KX263108Xiphinema  
pachtaicumiso:0.00240212,KX263109Xiphinemapachtaicumiso:0.002557566,KX263115Xiphinemapach  
taicumiso:0.002458789,KX263110Xiphinemapachtaicumiso:0.002459326,KX263111Xiphinemapachtaic  
umiso:0.002431386,KX263112Xiphinemapachtaicumiso:0.002369058,KX263113Xiphinemapachtaicumi  
so:0.002397248,KX263116Xiphinemapachtaicumiso:0.01249574,KX263114Xiphinemapachtaicumiso:0.  
002306202,HM921369Xiphinemapachtaicumnem:0.002287535,HM921372Xiphinemapachtaicumnem:0.  
002335796,HM921373Xiphinemapachtaicumnem:0.002347973,HM921376Xiphinemapachtaicumnem:0.  
002343849,HM921378Xiphinemapachtaicumnem:0.00218132,HM921375Xiphinemapachtaicumnem:0.0  
03926628,HM921374Xiphinemapachtaicumnem:0.008949313,JQ990057Xiphinemapachtaicumvou:0.00  
2451654):0.01914466,HM921370Xiphinemapachtaicumnem:0.008474806,(HM921371Xiphinemapachta  
icumnem:0.002310352,HM921377Xiphinemapachtaicumnem:0.002343359,HM921379Xiphinemapachta  
icumnem:0.002240575):0.007961255):0.09192357,JQ990058Xiphinemapincertumvouch:0.2789219):0.20  
28652,JQ9900562Xiphinemaparapachyder:0.3204827,KP268977Xiphinemaastaregiensec:0.5985193):2.3  
88636);

**D2-D3 region phylonetic tree Newick format.** Phylogenetic relationships within Longidoridae. Bayesian 50% majority rule consensus tree as inferred from the analysis of the D2-D3 region alignment under a GTR + I + G model. Posterior probabilities more than 0.70 are given for appropriate clades.

(KC618462elachista:0.3304446,KJ765343striaticiceps:0.3875549,((((((((((((((T60:0.007320508,(X\_NEMO56419B:0.002974046,Xpseudocoxi419:0.002943082,X\_NEMO57419B:0.002647499,AR108\_28S\_V14\_28s:0.03053452):0.01137349):0.0354402,((AR88\_Xbaetica:0.003032494,(KC567165Xbaetica:0.003003316,KC567166Xbaetica:0.007049422):0.01094237,KC567169Xbaetica:0.01062271):0.01031717,KC567167Xbaetica:0.006615035,KC567168Xbaetica:0.007076104):0.02496181):0.0104233,ST77\_Xcadavale nse:0.03268636):0.00988826,(5Xmacrodora:0.00286785,6Xmacrodora:0.002780554,2Xmacrodora:0.002960924,3Xmacrodora:0.002646251,4Xmacrodora:0.002787076,1Xmacrodora:0.006726694):0.05333541 ):0.04188505,((KU052864Xbakeri:0.006622855,DQ364685XspJZ2006:0.006756387,(KF292276Xbaker i:0.004043213,AY601623Xbakeri:0.02737743):0.006633957,KF292277Xbakeri:0.002786548,KF292278 Xbakeri:0.002674916):0.01287126):0.01463208,(((HG969302Xdiversicaudatum:0.002639253,JQ780367 Xdiversicaudatum:0.002820446,JQ780366Xdiversicaudatum:0.002834321,KF292279Xdiversicaudatum: 0.006580599,KF292280XdiversicaudatumC:0.002759464,EF538755Xdiversicaudatum:0.02329321):0.00 8616778,JQ780359Xdiversicaudatum:0.003053027):0.01141815,JQ780364Xdiversicaudatum:0.0028283 52,JQ780363Xdiversicaudatum:0.002592501,JQ780360Xdiversicaudatum:0.00271713,JQ780365Xdivers icaudatum:0.006046967,JQ780361Xdiversicaudatum:0.002660284,JQ780362Xdiversicaudatum:0.00270 2052):0.01216233):0.02959312):0.01731371,(KJ634067XspSAS2014:0.01774006,AY601625Xabrantinu m:0.02089432):0.03246368,(((Xcoxiuropaeum\_AR92\_28S:0.002894908,KC567174Xcoxiuropaeum:0 .002879188,KC567175Xcoxiuropaeum:0.002905172,KC567178Xcoxiuropaeum:0.00298059,KC56717 9Xcoxiuropaeum:0.007080532,KC567177Xcoxiuropaeum:0.007101402,KC567176Xcoxiuropaeum:0 .01058505):0.01169699,AY601624Xdiversicaudatum:0.01008234):0.03013179,(KC567170Xbelmontens e:0.003071328,KC567171Xbelmontense:0.003117761,KC567172Xbelmontense:0.0113315):0.0475412): 0.02626147,(Xturdetanense\_ST90:0.01626145,KC567186Xturdetanense:0.006556627):0.05267931,((Xpseudocoxi\_ar95\_28S:0.006838469,Xpseudocoxi\_ar95\_28s\_pimpollar:0.004712343):0.04144444,GU549 474Xglobosum:0.02482675):0.03342692):0.02217019):0.02572352,(HF546080Xmacroacanthum:0.0685 5756,HF546081Xmacroacanthum:0.003666105):0.1196972,(KM283422Xindex:0.03701543,(HG969307 Xindex:0.002740078,HM921401Xindex:0.003053629,HM921403Xindex:0.003098392,HM921404Xinde x:0.002951216,HM921405Xindex:0.002711382,HM921398Xindex:0.002733062,HM921399Xindex:0.0 0281512,HM921400Xindex:0.002995879,HM921406Xindex:0.002969727,HM921363Xindex:0.0028656 29,HM921349Xindex:0.002857936,HM921347Xindex:0.003046036,HM921364Xindex:0.002862009,KJ 802882Xindex:0.002891182):0.006891408,HM921402Xindex:0.002874062,HM921348Xindex:0.002889 663,AY601628Xindex:0.002762637,KJ802881Xindex:0.002835451):0.1467802,(((KJ8028 78Xcretense:0.002896913,KJ802879Xcretense:0.002757742,KJ802880Xcretense:0.003115469):0.00650 4573,AY601626Xpyrenaicum:0.007696816):0.04591493,(((KJ956388Xingens:0.01128435,KJ956389Xi ngens:0.006890237):0.02993821,KF446655Xcastilloi:0.02683624):0.0804229,(EU781538Xdentatum:0.0 1926217,AY601627Xdentatum:0.002573382):0.07441427):0.03696569):0.02533817):0.04054239,((AY6 01629Xbasiri:0.003088903,AY601630Xbasiri:0.006703335):0.02815267,AY601631Xcoxi:0.1160377):0 .0656656):0.09033786,((((((KP793046Xhunaniense:0.00653243,KP793047Xhunaniense:0.00283917):0. 009630446,KP793049Xhunaniense:0.003846925):0.01055145,KP793048Xhunaniense:0.003178081,(KF 290564Xhunaniense:0.002958997,EF188840Xhunaniense:0.006818715):0.02257728,EF188839Xhunani ense:0.01709645):0.02063284,EF188841Xhunaniense:0.005493802):0.006409911,EF026090Xhunaniens e:0.00425926):0.227211,(((Xturcicum\_ST90:0.007183576,KC567185Xturcicum:0.002895173,(Xturcicu m\_ST149:0.01144495,GU725077Xturcicum:0.002914639):0.007025706):0.08904873,(KC567183Xlupini :0.01091418,HM921352Xlupini:0.003226738):0.257643):0.04504703,(KX062686XspP112016:0.00292 1631,KX062687XspP112016Z:0.002880596,KX062688XspP112016:0.00755382):0.148925,((Xoleae:0. 002906869,1Xoleae:0.002695866):0.009384245,2Xoleae:0.01699993):0.2323662):0.05825266):0.04250 731,(((KU680965Xchambersi:0.003021338,KT698206Xchambersi:0.002791606,(KU680967Xchambersi :0.003422473,KT698208Xchambersi:0.003217952):0.006712961,(KU680966Xchambersi:0.002792162, KT698207Xchambersi:0.003048774):0.0198721,KT698205Xchambersi:0.00271673,DQ299512Xchamb ersi:0.002879693):0.02422227,AY601617Xchambersi:0.003086158):0.006630351,DQ299515Xnaturale :0.003655297):0.1548445,(((KF430801Xelongatum:0.00280284,EF140790Xelongatum:0.003057811,KF 430803Xelongatum:0.007541934,KF430802Xelongatum:0.01109198):0.03839509,AY601620Xsavanico la:0.1490262):0.1038284,(AY601618Xelongatum:0.01046726,AY601619Xinsigne:0.04335747):0.11320 93):0.1680251,(((ACC89\_setariae:0.02816805,AY601621Xsetariae:0.006886162,(DQ299513Xvulgare:0 .003088389,DQ299514Xvulgare:0.003156818):0.00684614):0.006747978,(CD1881b\_D23\_SB611:0.002 972709,CD1881a\_D23\_SB610:0.003098294):0.004604446):0.2177468,AY601622Xradicola:0.530078

6):0.04618362):0.04980569,((((Jao25\_nemU50\_28S:0.06864682,(((AR63\_Xadenohysterum:0.0102401, ((AR78\_Xadenohysterum:0.007108977,GU725075Xadenohystherum:0.002800571,JA06\_Xadenohysterum:0.002873474):0.008300178,KC567164Xadenohystherum:0.01532097):0.009532248):0.01635564,KC567180Xgersoni:0.06748364):0.01536973,(Xhispidum\_AR4\_U75:0.006559582,((KC567181Xhispidum:0.003016161,HM921346Xhispidum:0.01576728):0.005821422,HM921366Xhispidum:0.007512438):0.005702353):0.02129819):0.01487293):0.0284764,(((XAR16\_cohni:0.005832538,KC567173Xcohn:0.06167391):0.06427831,(Xmacrogastrum\_AR83\_28S:0.04154391,Xmacrogastrum\_AR82\_28S:0.003184705):0.0287986):0.01966303,GU725074Xhispanum:0.03530113):0.03512933):0.02981779,((GU725073Xpyrenaicum:0.05183194,(((KX062674Xitalia:0.002748834,KX062675Xitalia:0.007212043,KX062676Xitalia:0.0110746):0.007183641,KX062677Xitalia:0.00737537):0.03058964,(KJ802887Xitalia:0.003041553,AY601613Xitalia:0.007095021):0.00703394,FJ713153Xitalia:0.002922636):0.006889751,(KC567182Xitalia:0.007434854,(HM921350Xitalia:0.006783837,HM921351Xitalia:0.01064355):0.01096678):0.008303045):0.0645919,((Xsphaecocephalum\_AR73:0.002894426,AY601615XspYH2004:0.02295506):0.008436161,GU725076Xsphaerocephalum:0.01381512):0.05608421,((oc3v5\_nemk33\_28s:0.003116804,o3c4\_28snemk42:0.02368331):0.007356449,o3v4\_nemk32\_28s:0.003671222):0.1194872,(KX062678Xmeridianum:0.01278574,(KX062680Xmeridianum:0.003274739,KX062679Xmeridianum:0.002906727):0.009399814):0.1115652):0.01046977,((((HG969310Xvuittenezi:0.002851521,HG329724Xvuittenezi:0.002989063):0.01071518,AY601614Xvuittenezi:0.003085331,HG329725Xvuittenezi:0.01132499,EF614266Xvuittenezi:0.002924437):0.05410665,JQ240273Xgranatum:0.1120447):0.03005452,(KM586345Xherakliense:0.002673192,KM586347Xherakliense:0.006356817,KM586350Xherakliense:0.002766393,KM586349Xherakliense:0.01111611,KM586348Xherakliense:0.002915444,KM586346Xherakliense:0.002749907,(KM586352Xherakliense:0.002765731,KM586351Xherakliense:0.002841278):0.006779127):0.03276076):0.02678242,((KJ802883Xisraeliae:0.002772823,(KJ802886Xisraeliae:0.002859783,KJ802884Xisraeliae:0.01553527):0.0069398,KJ802885Xisraeliae:0.002917488):0.04731659,JN153101Xzagrosense:0.02972649):0.01398796):0.01299207,(KM199690Xbarensense:0.002805483,KM199691Xbarensense:0.002869636,KM199692Xbarensense:0.01098088):0.06110686):0.01600521):0.01804973):0.02268234,(Xnuragicum\_JAO36:0.01310503,GU725071Xnuragicum:0.002853194,GU725068Xnuragicum:0.003091287,GU725072Xnuragicum:0.002882339,GU725065Xnuragicum:0.002676749,GU725067Xnuragicum:0.002784975,GU725069Xnuragicum:0.002810864,GU725070Xnuragicum:0.002730231,GU725066Xnuragicum:0.00264348,KC567184Xnuragicum:0.003023657):0.09043222,(KX062683Xrobbinsi:0.003237542,KX062684Xrobbinsi:0.01155838,KX062685Xrobbinsi:0.01779519):0.1260405,((Xconurum\_st45\_n4\_28S:0.0280716,KX062673Xconurum:0.003042697,KX062671Xconurum:0.003171006):0.01016921,KX062672Xconurum:0.006619266):0.2076144):0.07246078,((ACC86\_Xcostaricense:0.003457656,ACC55\_Xcostaricense:0.007724772):0.0065141,(ACC46\_Xcostaricense:0.0032379,ACC61\_Xcostaricense:0.003145277):0.005635749):0.175697,(Xkrugi\_ACC13bulge:0.002848382,CD1880\_D23\_SA727:0.002922545,ACC47\_Xkrugi:0.003115783,CD1827\_D23\_Costa\_SA626:0.009055377):0.3868746):0.1571085):0.03900365):0.08835664,(KP793050Xbrasiliense:0.002915818,AY601616Xbrasiliense:0.003120606):0.1693326):0.2275644,((((KT735104XspJ94:0.006435362,(KU680973Xamericanum:0.01273486,DQ285668Xcitricolum:0.003314652,DQ299490Xcitricolum:0.003667027,DQ299491Xcitricolum:0.003078885,DQ299492Xcitricolum:0.003320781,DQ299493Xcitricolum:0.003351572,DQ299494Xcitricolum:0.003173181,AY601587Xsantos:0.003283617,(KU680976Xamericanum:0.007814606,AY601591Xamericanum:0.003407708,AY601590Xpacificum:0.003286916,AY601592Xcalifornicum:0.007595694,KX263172Xamericanum:0.003508464,KX263171Xamericanum:0.003263264,KX263170Xamericanum:0.003253826,KX263168Xamericanum:0.004628973):0.007972524,KU680968Xrivesi:0.003172532,JQ990029Xsantos:0.003241729,JQ990030Xsantos:0.007579925,(DQ299495Xgeorgianum:0.003348971,DQ299496Xgeorgianum:0.003185834,DQ299497Xgeorgianum:0.003352102,DQ299498Xgeorgianum:0.003235841,DQ299499Xgeorgianum:0.003403623,DQ299500Xgeorgianum:0.003398529,DQ299501Xgeorgianum:0.003615532,DQ299502Xgeorgianum:0.003258894,(DQ299503Xlaevistriatum:0.003579995,DQ299506Xlaevistriatum:0.003336945,DQ299505Xlaevistriatum:0.003075636):0.008571874,DQ299504Xlaevistriatum:0.003334766,AY601586XgeorgianumGG14:0.003167837):0.007727165):0.008025192,(KU680974Xamericanum:0.00830296,KU680975Xamericanum:0.01363283):0.008051609):0.007781286,(AY601588Xrivesi:0.002929522,AY601589Xrivesi:0.00321054,KX263149Xrivesi:0.005254849):0.01199753,KX263160Xcalifornicum:0.008494608,((KX263144Xcalifornicum:0.003566687,KX263143Xcalifornicum:0.003409932):0.0128717,KX263145Xamericanum:0.003679637):0.008299483,KX263121Xsp1SAS2016:0.01743006,KX263142Xsp1SAS2016:0.008168653,KX263122Xsp1SAS2016:0.003663539,KX263137Xsp1SAS2016:0.003464553,KX263130Xsp1SAS2016:0.003255159,KX263127Xsp1SAS2016:0.003446046,KX263126Xsp1SAS2016:0.003572792,KX263125Xsp1SAS2016:0.003251907,KX263129Xsp1SAS2016:0.003461594,KX263136Xsp1SAS2016CD472:0.003256601,KX263132Xsp1SAS2016:0.003462778,KX263131Xsp1SAS2016:0.003484733,KX263120Xsp1SAS2016:0.003070094,KX263119Xsp1SAS2016:0.003604495,KX263135Xsp1SAS2016:0.008824937,KX263128Xsp1SAS2016:0.003468879,KX263118Xsp1

SAS2016CD471:0.007917756,KX263134Xsp1SAS2016:0.003519737,KX263133Xsp1SAS2016:0.003277781,KX263124Xsp1SAS2016:0.003866479,(KX263141Xrivesi:0.02555006,(KX263140Xrivesi:0.003194725,(KX263139Xrivesi:0.003192127,KX263138Xrivesi:0.003086003):0.008095818):0.008928139,JQ990042Xparabrevicolle:0.02377114):0.01273136,KX263123Xsp1SAS2016:0.01926001):0.01303607,KX263152Xamericanum:0.01345979,KX263167Xsp2SAS2016:0.003474594,KX263166Xcalifornicum:0.003465096,KX263157Xcalifornicum:0.003499569,KX263158Xcalifornicum:0.003299617,KX263156Xcalifornicum:0.003595803,KX263161Xcalifornicum:0.003365568,KX263159Xcalifornicum:0.007994278,KX263151Xamericanum:0.008143963,(KX263165Xcalifornicum:0.003381591,KX263164Xcalifornicum:0.003620546,(KX263162Xcalifornicum:0.007933205,KX263163Xcalifornicum:0.008539537):0.008163461):0.008110519,KX263150Xamericanum:0.007887072,KX263175Xamericanum:0.003360766,KX263174Xamericanum:0.003387619,KX263173Xamericanum:0.00349847,KX263169Xamericanum:0.004291277,KX263146Xamericanum:0.006550996,KX263154Xcalifornicum:0.005271401,(KX263148Xsp4SAS2016:0.0126633,KX263147Xsp4SAS2016:0.003792179):0.007833743,(KX263155Xcalifornicum:0.01386161,KX263153Xcalifornicum:0.006003562):0.01384197,((DQ299507Xfloridae:0.003335271,DQ299508Xfloridae:0.003201583,DQ299509Xfloridae:0.00322912,DQ299510Xfloridae:0.003320124,DQ299511Xtarjanense:0.008159372):0.01305344,KP268965Xluci:0.00528157):0.007974577,(((KX263179Xbrevicolle:0.008427084,(HM163209Xbrevicollum:0.004717069,(HM163211Xlambertii:0.01321722,HM163210Xinaequale:0.03282091):0.007546471):0.01658546,AY601602Xtaylori:0.003441581,AY601603Xtaylori:0.03244493):0.007920069,AY601604Xbrevicollum:0.004713581):0.007962121,KR095280Xbrevicollum:0.003342533,AB635402Xbrevicolle:0.003317517,FM211649Xbrevicollum:0.003349981,AB675668Xbrevicolle:0.003317107,(AB675667Xbrevicolle:0.003267643,HQ184473Xbrevicollum:0.003476912):0.00796688,AB635401Xbrevicolle:0.00332672,KF430800Xbrevicollum:0.005432415,(KP793051Xbrevicolle:0.003144835,KP793052Xbrevicolle:0.003225959,KP793053XbrevicolleS:0.00320311,KP793054Xbrevicolle:0.003171114,KP793055Xbrevicolle:0.008293434):0.02037645,(JN091972Xamericanum:0.003262263,AB635403XspJPNHS09:0.003214476):0.02334343):0.008915765,AY601600Xdiffusum:0.01731165,AY601601Xbrevicollum:0.003159804,AY601605Xbrevicollum:0.003239344):0.02884843):0.01206266,((JQ990039Xrivesi:0.00341974,HM921358Xrivesi:0.003526237,HM921357Xrivesi:0.003264227,KX263176Xrivesi:0.003652317,JQ990038Xrivesi:0.01867795,JQ990037Xrivesi:0.008016807,KP268971Xrivesi:0.003306966):0.008547725,AY601593Xthornei:0.008059741,AY601599Xamericanum:0.008199378):0.008133047,KU680969Xrivesi:0.007729402,KU680972Xrivesi:0.003536231,KU680970Xrivesi:0.007319478,JX912150Xrivesi:0.003521999,JX912151Xrivesi:0.003215763,AY601595Xthornei:0.003058431,AY601598Xutahense:0.003277473,AY601597Xincognitum:0.01027643,AY601596Xbricolensis:0.007460168,KU680971Xrivesi:0.008403283,AY601594Xbricolensis:0.006554233,AY210845Xrivesi:0.003215432,KX263178Xsp1SAS2016:0.003375793,KX263177Xsp1SAS2016:0.003388056,JX912149Xrivesi:0.00336533):0.3035088,(KP268966Xmadeirense:0.06862255,JQ990041Xparatenuiculis:0.1370547):0.2292415):0.08710914,(((((((Xincertum\_AR7\_28S:0.002957921,JQ990031Xincertum:0.007159284,KU250157Xpenevi:0.003084124,Xincertum\_AR30\_28S:0.007444707):0.00853973,(KP268964Xincertum:0.003228476,Xincertum\_AR104\_28S:0.003298765):0.007081468):0.01222043,(KX263184Xpachtaicum:0.007887806,KP268968XpachtaicumA:0.008751059):0.007773875,(KX263182Xpachtaicum:0.003195433,JQ990033Xpachtaicum:0.007477231,AY601606Xpachtaicum:0.01143559,(HM921395Xpachtaicum:0.002827565,HM921354Xpachtaicum:0.002854589):0.007459037):0.00720391,(HM921391Xpachtaicum:0.003043786,HM921365Xpachtaicum:0.002983916):0.0070349,HM921353Xpachtaicum:0.002989693,(HM921393Xpachtaicumn:0.008444002,KX263181Xpachtaicum:0.008470818):0.007131691,KX062681Xpachtaicum:0.0360302):0.007685752,KJ802888Xpachtaicum:0.003029692,KU250155Xpachtaicum:0.003056691,(HM921394Xpachtaicum:0.002959108,HM921355Xpachtaicum:0.002944973):0.007060525,(HM921396Xpachtaicum:0.003125813,HM921356Xpachtaicumn:0.002791141):0.007277168,HM921389Xpachtaicum:0.003058361,HM921392Xpachtaicum:0.00313159,KX062682Xpachtaicum:0.00310957,HM921390Xpachtaicum:0.002962382,HM921397Xpachtaicum:0.003438817,KX263183Xpachtaicum:0.01691646):0.03309398):0.06695687,((Xparapachydermum\_28s\_AR35:0.004131413,KP268969XparapachydermumA:0.009024892):0.01490168,JQ990034Xparapachydermum:0.003298655,JQ990035Xparapachydermum:0.009939527,JQ990036Xparapachydermum:0.01522161,KP268970Xparapachydermum:0.01987149):0.05080349):0.01860966,KP268955Xastaregiense:0.04459825):0.02084488,(KX263186Xsp3SAS2016:0.002869592,KX263185Xsp3SAS2016:0.003228588):0.02561219,AY601607Xpachtaicum:0.01067054):0.07857834):0.02784109,(KP268956Xplesiopachtaicum:0.002932295,KP268958Xplesiopachtaicum:0.006116783,KP268957Xplesiopachtaicum:0.003094008):0.04641115):0.1594515,AY601608Xpachydermum:0.1917492):0.0880208,((KP268959Xvallense:0.003322192,KP268960Xvallense:0.002914661,KP268961Xvallense:0.002971419):0.2524367,(((KU250151Xbrowni:0.003331673,KU250153Xbrowni:0.003298403,KU250152Xbrowni:0.003353764,KU250154Xbrowni:0.002873514):0.1334222,KU250156Xparasimile:0.04548806):0.1835146,((KX263180Xsimile:0.01013382,JQ780368Xsimile:0.003485115,JQ780370Xsimile:0.003438799,JQ780369Xsimile:0.00332326,(KJ802889Xsimile:0.008091218



,KJ802890Xsimile:0.003643342):0.007680816):0.008017043,AY601609Xsimile:0.00573311):0.2910939):0.05776355):0.06207661):0.06219213):0.06410484,(KP268962Xbrevisicum:0.00752585,AY601610Xbrevisicum:0.00380798):0.2074632,((KP268963Xduriense:0.01619653,JQ990032Xduriense:0.003911282):0.0239138,(KP268967Xopisthohysterum:0.003471414,JQ990040Xopisthohysterum:0.003377384):0.0588685):0.1298855):0.3141723):0.1026592,((((((KJ802862Lcloselongatus:0.003582598,KJ802863Lcloselongatus:0.003308062,KJ802866Lcloselongatus:0.003278432,KJ802864Lcloselongatuscret3:0.003102961,KJ802865Lcloselongatuscret4:0.003223302):0.0487295,((KJ802867Lcretensis:0.007615027,KJ802869Lcretensis:0.003125611,KJ802868Lcretensis:0.01201473):0.04914386,KF242334Lsp4SAS2014CD1117:0.01429875):0.02700243,((KJ802870Lpseudoelongatuscret9:0.003565514,KJ802872Lpseudoelongatuscret11:0.003248489,KJ802871Lpseudoelongatus:0.003372432,KJ802873Lpseudoelongatus:0.007961064):0.03146281,((KJ802874Lmoesicus:0.003539879,HM447029LmoesicusVrhpolje:0.00340547,(KJ802876Lmoesicus:0.002967866,KJ802876Lmoesicuscret15:0.003078788):0.009017106,(KJ802875LmoesicusLi90:0.003779091):0.01828091):0.02979171):0.02466635):0.03446937,(KF242335Lsp3SAS2014CD1112:0.02987451,((KX062667LeuonymusR30voucherLEP12:0.0176736,KR152295LperangustusSFR\_1:0.03712241):0.02079396,KF242333LeuonymusCD1118:0.003216005,KF242331LeuonymusCD1086:0.00324013,KF242332LeuonymusCD1130:0.007377515,AY601573Leuonymus:0.01211607):0.06297334,(KU747173LspPC2016ES1:0.00331218,KU747174LspPC2016AA14:0.003473729):0.0662315):0.05168201,(KT755457LattenuatusFK329:0.003373238,AY601572Lattenuatus:0.003256726,KR911851LattenuatusFK320:0.003301811):0.07526219,((KX398055Lkuiperi:0.003500265,KX398056LkuiperiA:0.003279928):0.08832632,((KX062668LglycinesR15voucherLGP11:0.01551326,(KX062670LglycinesR25voucherLGP4:0.01278195,KX062669Lglycinesn72voucherLGP3:0.003410406):0.01069121):0.09172943,AY601575Ledmundsi:0.1976432):0.03559121,((KF242330Lsp1SAS2014CD833:0.06704617,KF242328Lsp6SAS2014CD876:0.05318173):0.01717449,KF242329Lsp2SAS2014CD897:0.01975365):0.05943685,AY601574Lathesinus:0.06230926):0.105719):0.02522207):0.01947215,AY601571Lapulus:0.1422129,(((KT308861LvallensisN35:0.00345233,KT308862LvallensisA84:0.01860133):0.06951055,JX445116Lrubi896:0.024928):0.06159107,((((((JX445105LiuglandisD03:0.003326476,JX445104LiuglandisH33:0.003548161):0.1440387,(JX445106LbaeticusC80:0.01324581,JX445107LbaeticusB41:0.03794419):0.1565039,(KT308856LmacrodorV33:0.03284128,KT308855LmacrodorV4:0.2971497):0.1100558):0.05073025):0.04330459,JX445108LfasciatusA15:0.1566415):0.04911173,(KT308871LoleaeQ56:0.006753187,JX445103LoleaeE77:0.003671204):0.1175679,((KJ802877Lorientaliscret16:0.003305967,GQ988722LorientalisfromIran:0.003375695,KP406932LorientalisCD1379:0.003336595,KP406934LorientalisCD1437:0.003240261,KP406933LorientalisN10:0.00757856,KP406931LorientalisP28:0.003267045):0.008066105,GU001823Lorientalis:0.004343787):0.02513847,(KF242336Landalusicus868:0.007124306,JX445102Landalusicus600:0.003338464,JX445101LandalusicusG65:0.008307437):0.1004199):0.07056293):0.03206194):0.02364023,((KT308872Lvineacola73:0.008455557,(JX445110LvineacolaF23:0.003509501,JX445109LvineacolaC79:0.01854536,JX445111LvineacolaA54:0.0221108):0.007423793):0.007575544,KT308873LvineacolaL99:0.01497778):0.1006615,(((KT308857LonubensisL47:0.003300356,KT308858Lonubensisw31:0.003305645):0.09216411,AY601581Lgoodeyi:0.04771924,JX445114LcrataegiC92:0.1043821):0.01522392,KT308869LlusitanicusK2:0.1065815):0.02048505,((KT308870LmagnusW22:0.008876746,JX445112LmagnusB90:0.003196381,HM921361Lmagnusnem229:0.003413013,JX445113Lmagnusd62:0.003321537,HM921362Lmagnusnem230:0.01319084):0.03416736,((KT308875LvinearumO28:0.003653389,KT308876LvinearumU69:0.00330074,KT308874LvinearumN74:0.02493213):0.01325148,KT308877LvinearumV18:0.007949388):0.05237889):0.0316592):0.05103082,((KT308859LsilvestrisX11:0.02713136,KT308860LsilvestrisL58:0.003602228):0.0204471,((KT308863LwicuoleaU50:0.003269559,KT308864Lwicuoleaw16:0.003851687,KT308866Lwicuoleax9:0.007814743):0.009345505,KT308865Lwicuoleaw81:0.02693979):0.05348762):0.102865):0.04905618):0.1178428,(((KT308868Lintermediusx4:0.02411714,JX445117Lintermedius642:0.003637553):0.01360006,(KF242312LintermediusCD1122:0.01361952,KF242311LintermediusCD1085:0.009297027):0.008898998):0.01381613,AY601577Lpiceicola:0.009610942):0.02993847,EF538754Luroshis:0.05264615,(KF242316LartemisiaeCD1144:0.003899092,(KF242315LartemisiaeCD1146:0.003504422,(KF242314LartemisiaeCD1127:0.003494503,KF242313LartemisiaeCD1115:0.00342331):0.006548181):0.007113265):0.1018309,(KF242310LelongatusCD1145:0.006461803,HM447032LelongatusMaribor:0.02994309):0.01101575,KF242299LelongatusCD1205:0.003625271,KF242306LelongatusCD1114:0.003726664,KF242304LelongatusCD1132:0.008034835,KF242298LelongatusCD1125:0.003523306,KF242297LelongatusCD1126:0.00371051,AY601578Lelongatus:0.003581461,KF242296LelongatusCD1123:0.003157925,KF242294LelongatusCD1345:0.003443101,KF242309Lelongatus591:0.003474864,KF242308LelongatusCD1139:0.003578172,KF242307LelongatusCD1141:0.00325382,KF242305LelongatusCD1135:0.003489252,KF242303LelongatusCD1140:0.003624155,KF242301LelongatusCD1116:0.003477086,KF242302LelongatusCD1290:0.003692075,KF242295LelongatusCD8541:0.00823294,KF242300LelongatusCD1134:0.003724622):0.07344762):0.0728459,((

KF292307Laetnaeus122:0.003400742,(KF242324LaetnaeusCD1138:0.005175095,KF242323LaetnaeusCD1121:0.003578463):0.01163334,KF242319LaetnaeusCD1143:0.003435249,KF242318LaetnaeusCD1111:0.003371112,KF242322LaetnaeusCD1142:0.003267824,KF242321LaetnaeusCD1129:0.003294279,KF242320LaetnaeusCD1108:0.003510548,(KF242327LleptocephalusCD1119:0.003683088,KF242326LleptocephalusCD1136:0.003537541,DQ364600Lleptocephalus:0.003222856,AY601580Lleptocephalus:0.01796537,KF242325LleptocephalusCD1131:0.003572621):0.02632801,KC357770Laetnaeus:0.003187277,KC357771Laetnaeus:0.007936383):0.117229,((KF242317LdistinctusCD11281:0.003258941,EF654539Ldistinctus:0.00333031):0.07995321,(DQ364599Ljuvenilis:0.03619436,AY601579Ljuvenilis:0.00428581):0.05768391):0.02979332):0.020676):0.05076212):0.04755072,(((KT308867Lalvegusw86:0.003256945,JX445115LalvegusE76:0.01309763):0.008264462,HM921360Lalvegusnem228:0.00356605):0.007943254,HM921359Lalvegusnem227:0.01459797):0.1770637):0.02905386):0.03185859,(KT308852LindalusM44:0.003262541,KT308853LindalusM40:0.003290395,KT308854LindalusW27:0.01236178):0.1454517):0.02559581,AB477069LspDLP003for:0.1146051,AY601576Lbreviannulatus:0.1740047,((KT755458LdanuviiFK305:0.003485914,KU507542LdanuviiFK050:0.003551398):0.08147321,AY601570Larthen sis:0.09999129):0.06128098):0.02039372):0.03555576,AY494715Lamericanum:0.1571725):0.09554393 ,HQ735098LspITDL2011:0.5244749):0.0791984,(((KX062664Lafricanusz18voucherAFP3:0.003307333,(KX062665Lafricanusz17voucherAFP1:0.007606657,KX062666LafricanusR29voucherAFP12:0.007981454):0.007867802,KF242339LafricanusCD832:0.007854345):0.007692453,KF242341LafricanusCD1511:0.01687229,KF242340LafricanusCD831:0.007529252,KF242337LafricanusCD1512:0.007900467,KF242338LafricanusCD1301:0.003241407,KP711809Lafricanus:0.003541795):0.007581526,AY601583Lafricanus:0.005701368):0.2389623,(((KJ427790ParaLrex:0.003314167,KJ427792ParaLrex:0.003085272,AY601582ParaLspYH2004:0.003219823,KJ427793ParaLrex:0.008202933,KJ427791ParaLrexFK:0.00318183):0.06812293,JN032587ParaLiranicus:0.1696057):0.03006759,(KF412826ParaLmaximus:0.04732201,((EU026155ParaLlitoralis:0.03976043,EU026156ParaLparamaximus:0.05553636):0.0312815,JQ673403ParaLplesioepimikis:0.09164458):0.03882474):0.02657352):0.2234287):0.0512661):0.08355667,((((KR351254LasiaticusG80:0.003169228,KR351255Lasiaticus6\_59:0.01260627,KR351256Lasiaticus59\_T7:0.02461584):0.1669243,KJ873104LhangzhouensisstrainNB004:0.2582426):0.1608868,((KJ741239LspJH2014strain82461:0.003246717,KJ741240LspJH2014strain82462:0.003340132,KJ741241LspJH2014strain82463:0.003306685):0.1224453,AY601585Lcamelliae:0.07951699):0.1878883):0.2149196,(HQ822266LhenanusHZ001:0.005945571,HQ822267LhenanusFY028:0.003800306):0.5231072):0.08174767,(((KF280150LspLTD23:0.07019045,(KF242343Lsp5SAS2014CD5062:0.003372347,KF242342Lsp5SAS2014CD5061:0.01300531):0.06028677,AY601584Ldiadecturus:0.1208307):0.02804973,KF552069LjonesiL5:0.009726248):0.2849681,KF270638LspLSD253:0.3666457):0.1760201):0.1122045):0.04238591,((((((KJ567473Lcaespiticola64L28SlargesubunitribosomalRNA:0.003458839,KJ567472Lcaespiticola30L28SlargesubunitribosomalRNA:0.003177847,HM447030LcaespiticolaBrdo:0.02820485):0.01421556,KF242344LcaespiticolaCD1109:0.03106662):0.01683151,AY601567Lcaespiticola:0.03660468):0.08563565,((FR775761LspFDL2011partial28SrRNAindividual58:0.003204479,FR775762LspFDL2011partial28SrRNAindividual59:0.003193417):0.1222478,(KF242347LlignosusCD1120:0.005686124,(KF242346LlignosusCD1133:0.00308737,KF242345LlignosusCD1124:0.003430614):0.006876444):0.1545625):0.03378825):0.02733422,((EF538750Lpoessneckensis:0.002981865,EF538751Lpoessneckensis:0.007858738):0.09640575,(JN631811LcarniolensisKrmacina:0.003334906,JN631812LcarniolensisDrasici:0.003337351):0.1717861):0.051979):0.03336877,(((JN627414LhelveticusCH28SlargesubunitribosomalRNA:0.003349321,JN627415LhelveticusMOR28SlargesubunitribosomalRNA:0.003218136,EF538753Lhelveticus:0.003266161,HM447031LhelveticusTrskagora:0.007986889):0.008138024,AY601566Lhelveticus:0.01843099):0.03663016,(AY601565Lmacrosona:0.003313557,EF538752Lmacrosona:0.02629073):0.03997731):0.06601085):0.185048,(JQ240274Lpsi:0.003718595,JQ240274LpsiH56:0.003540132,AY601568Llatocephalus:0.013543,AY601569Llatocephalus:0.007907812):0.4611016):0.03374844,JN032584ParaLbikanerensis:0.3084156):0.07130956):0.1468785):0.1586605,(KX136868LlaevicapitatusP53:0.003016028,KX136865LlaevicapitatusO36:0.00317735,KX136866LlaevicapitatusO48:0.003008099,KX136867LlaevicapitatusP52:0.003122109):0.3158108):2.206304);

## **Supporting Information Figures (Figs S1-S3)**

**Figure S1.** Phylogenetic relationships within Longidoridae. Bayesian 50% majority rule consensus tree as inferred from the analysis of the partial *coxI* sequence alignment under a TrN + I+ G model. Posterior probabilities more than 0.7 are given for appropriate clades. New sequences obtained in this study are in bold.

**Figure S2.** Phylogenetic relationships within Longidoridae. Bayesian 50% majority rule consensus tree as inferred from the analysis of the first and second nucleotide from each codon from the partial *coxI* sequence alignment under a TVM + I+ G model. Posterior probabilities more than 0.7 are given for appropriate clades. New sequences obtained in this study are in bold.

**Figure S3.** Phylogenetic relationships within Longidoridae. Bayesian 50% majority rule consensus tree as inferred from the analysis of the D2-D3 region alignment under a GTR + I + G model. Posterior probabilities more than 0.7 are given for appropriate clades. New sequences obtained in this study are in bold.

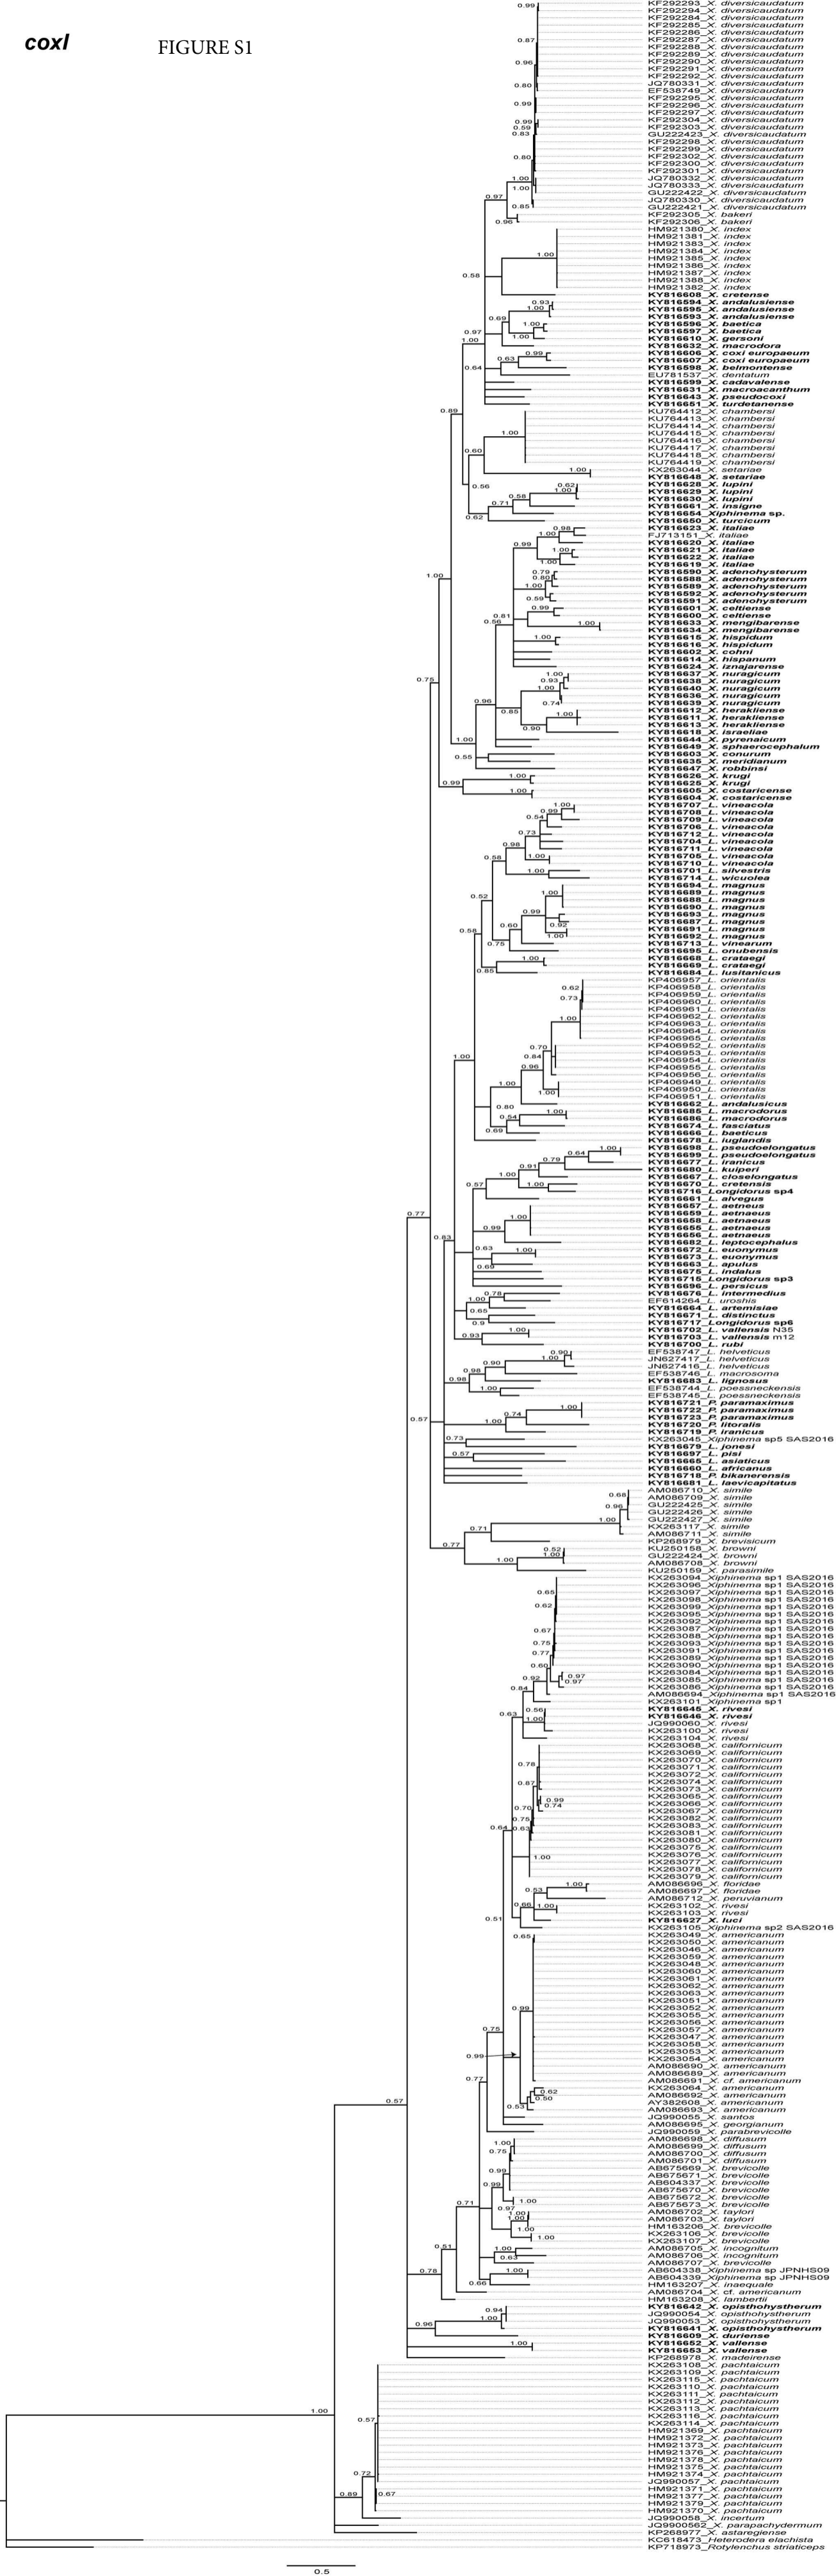

cox1

FIGURE S2

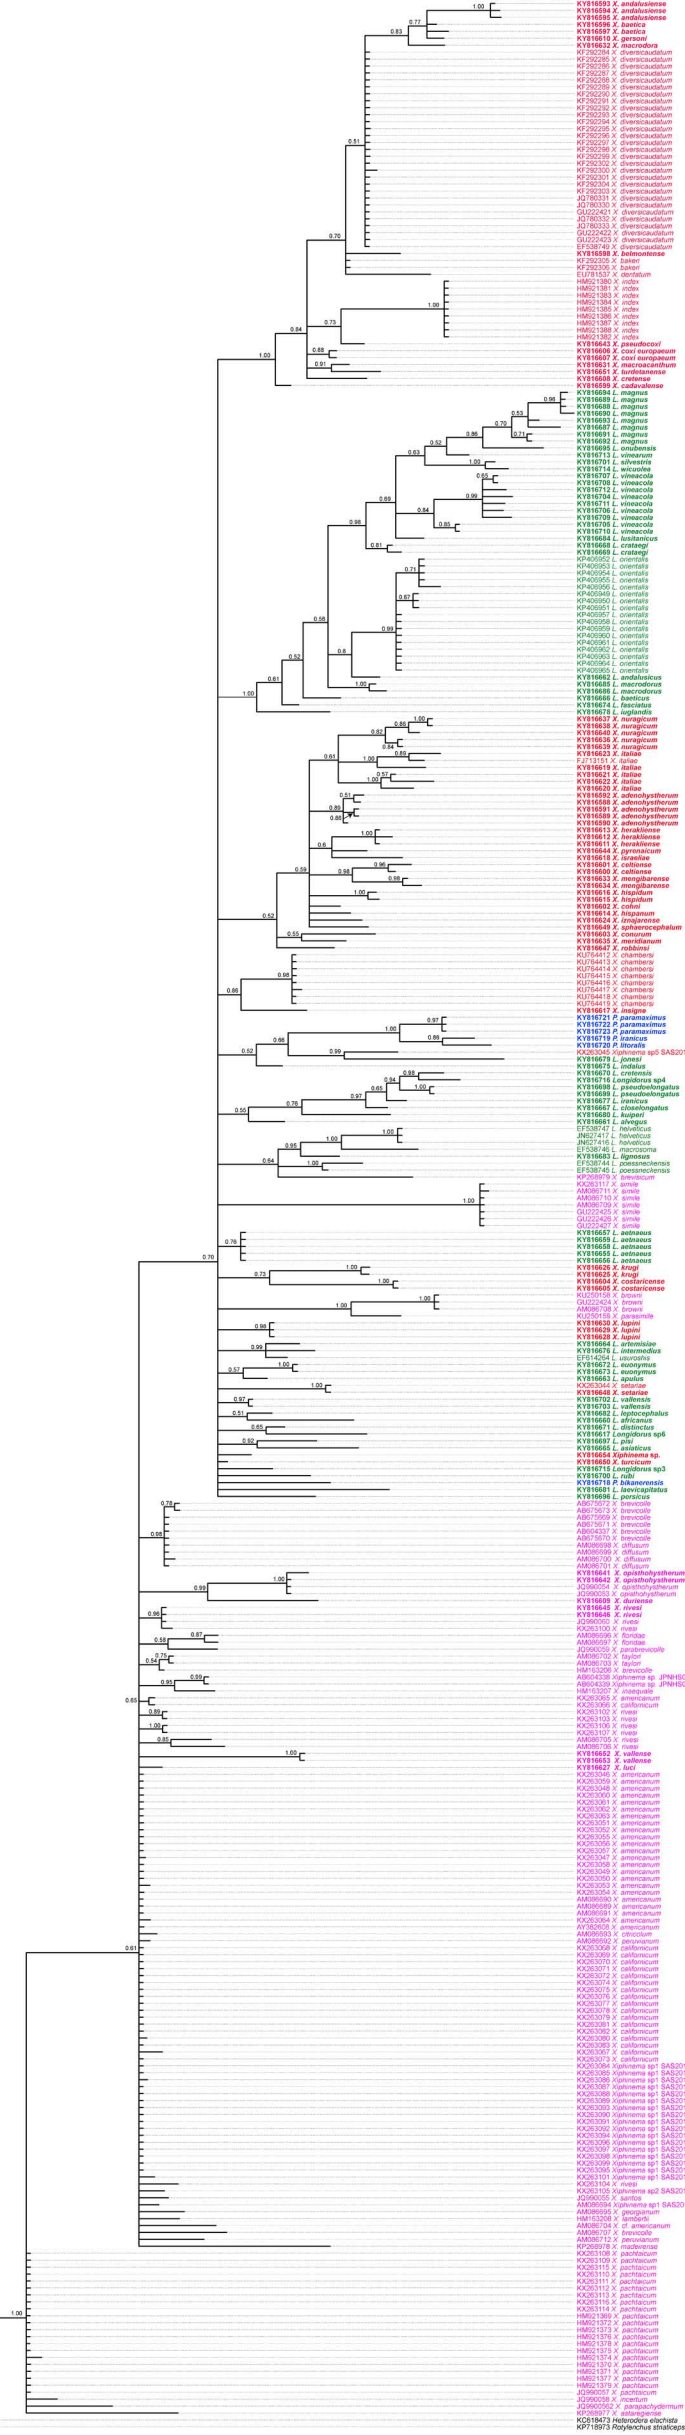

FIGURE S3

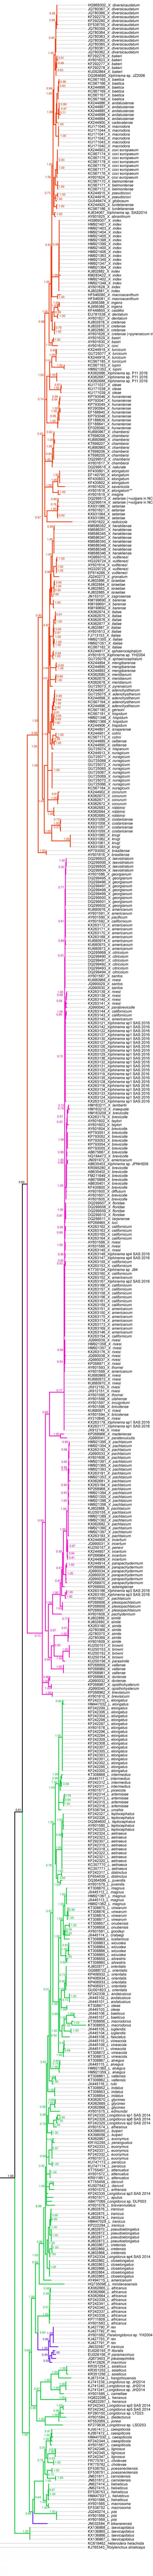

**Xiphinema non-americanum group species**

**Xiphinema americanum group species**

**Longidorus group species**

**Paralongidorus spp.**
